# 1 Integrated Host/Microbe Metagenomics Enables Accurate Lower Respiratory 2 Tract Infection Diagnosis in Critically Ill Children

3

## 4 Authors

5 Eran Mick<sup>1,2,3,\*</sup>, Alexandra Tsitsiklis<sup>2,\*</sup>, Jack Kamm<sup>1,^,\*</sup>, Katrina L. Kalantar<sup>4</sup>, Saharai Caldera<sup>1,2</sup>,  
6 Amy Lyden<sup>1</sup>, Michelle Tan<sup>1</sup>, Angela M. Detweiler<sup>1</sup>, Norma Neff<sup>1</sup>, Christina M. Osborne<sup>5</sup>,  
7 Kayla M. Williamson<sup>6</sup>, Victoria Soesanto<sup>6</sup>, Matthew Leroue<sup>5</sup>, Aline B. Maddux<sup>5</sup>, Eric A. F. Simões<sup>5</sup>,  
8 Todd C. Carpenter<sup>5</sup>, Brandie D. Wagner<sup>5,6</sup>, Joseph L. DeRisi<sup>1,7</sup>, Lilliam Ambroggio<sup>5</sup>,  
9 Peter M. Mourani<sup>5,8,‡</sup>, Charles R. Langelier<sup>1,2,‡,+</sup>

## 10 Affiliations

11 <sup>1</sup> Chan Zuckerberg Biohub, San Francisco, CA, USA

12 <sup>2</sup> Division of Infectious Diseases, Department of Medicine, University of California, San  
13 Francisco, CA, USA

14 <sup>3</sup> Division of Pulmonary, Critical Care, Allergy and Sleep Medicine, Department of Medicine,  
15 University of California, San Francisco, CA, USA

16 <sup>4</sup> Chan Zuckerberg Initiative, San Francisco, CA, USA

17 <sup>5</sup> Department of Pediatrics, University of Colorado and Children's Hospital Colorado, Aurora, CO,  
18 USA

19 <sup>6</sup> Department of Biostatistics and Informatics, Colorado School of Public Health, University of  
20 Colorado, Aurora, CO, USA

21 <sup>7</sup> Department of Biochemistry and Biophysics, University of California, San Francisco, CA, USA

22 <sup>8</sup> Department of Pediatrics, University of Arkansas for Medical Sciences and Arkansas Children's  
23 Research Institute, Little Rock, AR, USA

24 <sup>^</sup> Present address: Genentech, Inc., South San Francisco, CA, USA

25

26 \* These authors contributed equally

27 ‡ These authors jointly supervised this work

28 + Correspondence to:

29 Charles R. Langelier  
30 Division of Infectious Diseases, Department of Medicine  
31 University of California, San Francisco  
32 513 Parnassus Ave, Room HSE 401  
33 San Francisco, CA 94122  
34 P: 415-418-3647  
35 [chaz.langelier@ucsf.edu](mailto:chaz.langelier@ucsf.edu)

36 **ABSTRACT**

37

38 **BACKGROUND.** Lower respiratory tract infection (LRTI) is a leading cause of death in  
39 children worldwide. LRTI diagnosis is challenging since non-infectious respiratory illnesses  
40 appear clinically similar and existing microbiologic tests are often falsely negative or detect  
41 incidentally-carried microbes, resulting in antimicrobial overuse and adverse outcomes. Lower  
42 airway metagenomics has the potential to detect host and microbial signatures of LRTI. Whether  
43 it can be applied at scale and in a pediatric population to enable improved diagnosis and treatment  
44 remains unclear.

45 **METHODS.** We used tracheal aspirate RNA-sequencing to profile host gene expression  
46 and respiratory microbiota in 261 children with acute respiratory failure. We developed a gene  
47 expression classifier for LRTI by training on patients with an established diagnosis of LRTI  
48 (n=117) or of non-infectious respiratory failure (n=50). We then developed a classifier that  
49 integrates the host LRTI probability, abundance of respiratory viruses, and dominance in the lung  
50 microbiome of bacteria/fungi considered pathogenic by a rules-based algorithm.

51 **RESULTS.** The host classifier achieved a median AUC of 0.967 by cross-validation,  
52 driven by activation markers of T cells, alveolar macrophages and the interferon response. The  
53 integrated classifier achieved a median AUC of 0.986 and increased the confidence of patient  
54 classifications. When applied to patients with an uncertain diagnosis (n=94), the integrated  
55 classifier indicated LRTI in 52% of cases and nominated likely causal pathogens in 98% of those.

56 **CONCLUSIONS.** Lower airway metagenomics enables accurate LRTI diagnosis and  
57 pathogen identification in a heterogeneous cohort of critically ill children through integration of  
58 host, pathogen, and microbiome features.

59

## 60 INTRODUCTION

61 Lower respiratory tract infection (LRTI) causes more deaths each year than any other type  
62 of infection and disproportionately impacts children(1–4). The ability to accurately determine  
63 whether LRTI underlies or contributes to respiratory failure in the intensive care unit and to identify  
64 the etiologic pathogens is critical for effective and targeted treatments. However, LRTI diagnosis  
65 is challenging since non-infectious respiratory conditions can appear clinically similar. Moreover,  
66 no microbiologic diagnosis is obtained in many cases of suspected LRTI since standard tests  
67 (such as bacterial culture) suffer from a narrow spectrum of targets and limited sensitivity (3, 5–  
68 8). At the same time, children are especially susceptible to false positive diagnoses due to  
69 frequent incidental carriage of potentially pathogenic microbes(3, 5, 9–12). As such, LRTI  
70 treatment is often empirical, leading to antimicrobial overuse, selection for resistant pathogens,  
71 and adverse outcomes(13–15).

72 Profiling host gene expression in the blood has shown promise as an innovative modality  
73 for diagnosing respiratory infection in hospitalized patients(16, 17). However, this approach has  
74 not been well studied in the diagnostically challenging critically ill pediatric population. Moreover,  
75 while blood gene expression can in some cases distinguish between the response to viral and  
76 bacterial infection(16–21), it cannot pinpoint the specific pathogens active in the respiratory tract,  
77 which is critical for optimal antimicrobial therapy.

78 Metagenomic next generation sequencing (mNGS) of lower airway samples (e.g., tracheal  
79 aspirate) has the potential to detect pathogens and host gene expression signatures of LRTI(22).  
80 Whether such an approach can be successfully applied at scale for the purpose of clinical  
81 diagnosis remains unclear. Its applicability in a pediatric population has also never been examined  
82 despite well-established age-related differences in LRTI epidemiology(3, 9), rates of incidental  
83 pathogen carriage(3, 5, 9), and the immune response to infection(23, 24). Furthermore, to our  
84 knowledge, no metagenomic approach for LRTI diagnosis thus far integrates host and microbial  
85 features into a single diagnostic output, a crucial step toward streamlined clinical application.

86           Here, we perform metagenomic RNA sequencing of tracheal aspirate in a prospective  
87 cohort of 261 children with acute respiratory failure requiring mechanical ventilation. We develop  
88 a host gene expression classifier for LRTI by training on patients with an LRTI diagnosis supported  
89 by clinical microbiologic testing and patients with respiratory failure due to non-infectious causes.  
90 We then develop a classifier that integrates host, pathogen, and microbiome features to  
91 accurately diagnose LRTI and identify the likely causal pathogens, including in cases with  
92 negative clinical microbiologic testing. Our results demonstrate the feasibility of lower airway  
93 metagenomics for improved LRTI diagnosis in a large and heterogeneous cohort and reveal the  
94 importance of profiling both the pulmonary immune response and microbiome in a pediatric  
95 population.

96

## 97 **RESULTS**

### 98 **Patient cohort and LRTI adjudication**

99           We enrolled children with acute respiratory failure requiring mechanical ventilation at eight  
100 hospitals in the United States between February 2015 and December 2017, as previously  
101 described(9, 25). Tracheal aspirate (TA) was collected within 24 hours of intubation and  
102 underwent metagenomic next generation sequencing (mNGS) of RNA to assay host gene  
103 expression and detect respiratory microbiota (**Figure 1**). High-quality host gene expression and  
104 microbial data was obtained for 261 patients.

105           Adjudication of LRTI status was blinded to mNGS results and depended on the  
106 combination of two elements: i) a retrospective clinical diagnosis made by study-site clinicians,  
107 who reviewed all clinical, laboratory and imaging data available at the end of the admission, and  
108 ii) any standard-of-care respiratory microbiologic diagnostics performed during the admission  
109 (nasopharyngeal swab viral PCR and/or TA culture). Patients were assigned to one of four LRTI  
110 status groups, as follows: i) Definite, if clinicians made a diagnosis of LRTI and the patient had  
111 clinical microbiologic findings (n=117); ii) Suspected, if clinicians made a diagnosis of LRTI but

112 there were no microbiologic findings (n=57); iii) Indeterminate, if no diagnosis of LRTI was made  
113 despite some microbiologic findings (n=37); and iv) No Evidence, if clinicians identified a clear  
114 non-infectious cause of acute respiratory failure and no clinical or microbiologic suspicion of LRTI  
115 arose (n=50) (**Figure 1**). We note that comprehensive microbiologic testing was not always  
116 performed in the No Evidence group in the absence of clinical suspicion.

117 The Definite and No Evidence groups were used to develop the metagenomic classifiers  
118 and to evaluate their performance by cross-validation due to the high degree of confidence in their  
119 clinical diagnoses (**Figure 1**). The patients in the Definite group were 39% female with a median  
120 age of 0.5 years (IQR 0.2-1.8) while the patients in the No Evidence group were 50% female with  
121 a median age of 6.5 years (IQR 1.5-12.9) (**Table 1; Supplemental Figure 1**). The difference in  
122 the age distribution of the two groups ( $p < 0.001$ , Mann-Whitney test) reflected recognized  
123 epidemiological distinctions in the conditions typically leading to respiratory failure in very young  
124 versus older children(3, 5).

125 Within the Definite group, 95% of patients were intubated by two days from hospital  
126 admission, indicative of community-acquired infection (**Table 1**). Clinical microbiologic testing  
127 identified viral infection alone in 46% of patients, bacterial infection alone in 14% of patients, and  
128 viral/bacterial co-infection in 40% of patients. The most common pathogens were respiratory  
129 syncytial virus (RSV) and *Haemophilus influenzae*, which frequently co-occurred(9). Diagnoses  
130 in the No Evidence group included trauma, neurological conditions, cardiovascular disease,  
131 airway abnormalities, ingestion of drugs/toxins, and sepsis that was clearly unconnected to LRTI.  
132 Nevertheless, most patients received antibiotic treatment by the time of TA sample collection in  
133 both the Definite (96%) and No Evidence (84%) groups (**Table 1**).

#### 134 **Classification of LRTI status based on TA host gene expression features**

135 We first compared TA host gene expression between the Definite and No Evidence groups  
136 to determine whether it could distinguish patients based on LRTI status, regardless of the

137 underlying cause of infection. We identified 4,718 differentially expressed genes at a Benjamini-  
138 Hochberg adjusted  $p < 0.05$  (**Supplemental Figure 2A; Supplemental Data 2**). As expected,  
139 gene set enrichment analysis identified elevated expression of pathways involved in the immune  
140 response to infection in the Definite group (**Supplemental Figure 2B; Supplemental Data 3**).  
141 Pathways related to the interferon response, a hallmark of anti-viral innate immunity, were most  
142 strongly upregulated, consistent with the high prevalence of viral infections in the Definite group.  
143 Additional immune pathways upregulated in this group included toll-like receptor signaling,  
144 cytokine signaling, inflammasome activation, neutrophil degranulation, antigen processing, and B  
145 cell and T cell receptor signaling. Conversely, pathways with reduced expression in the Definite  
146 group included translation, cilium assembly and lipid metabolism (**Supplemental Figure 2B;**  
147 **Supplemental Data 3**).

148         Since we observed a clear host signature of infection, we developed a classification  
149 approach to distinguish the Definite and No Evidence patients based on gene expression and  
150 evaluated its performance by 5-fold cross-validation. For each train/test split, we: i) used lasso  
151 logistic regression on the samples in the training folds to select a parsimonious set of informative  
152 genes, ii) trained a random forest classifier using the selected genes, and iii) applied it to the  
153 samples in the test fold to obtain a host probability of LRTI.

154         Our approach yielded a median area under the receiver operating characteristic curve  
155 (AUC) of 0.967 (range: 0.953-0.996), with the number of genes selected for use in the classifier  
156 ranging from 11 to 25 across the five train/test splits (**Figure 2A; Supplemental Table 1**). Using  
157 a 50% out-of-fold probability threshold to classify a patient as suffering from LRTI (LRTI+), the  
158 classifier assigned 92% of Definite patients and 80% of No Evidence patients according to their  
159 clinical LRTI adjudication (**Figure 2B**).

160         Having validated the performance of our approach by cross-validation, we then applied  
161 lasso logistic regression to all the Definite and No Evidence patients to select a final set of genes  
162 (n=14) for later classification of patients with Suspected or Indeterminate LRTI status (**Figure 2C;**

163 **Supplemental Table 2**). As expected, the genes in the final classifier set that were assigned high  
164 absolute regression coefficients were also repeatedly selected in the cross-validation procedure  
165 (**Supplemental Table 2**).

166 The selected genes with the most positive regression coefficients, corresponding to higher  
167 expression in the Definite group, were: *GNLY*, encoding an anti-bacterial peptide present in  
168 cytolytic granules of cytotoxic T cells and natural killer cells(26); *SLC38A2*, encoding a glutamine  
169 transporter upregulated in CD28-stimulated T cells(27, 28); *FFAR3*, encoding a G protein-coupled  
170 receptor activated by short-chain fatty acids that is induced by alveolar macrophages upon  
171 infection(29); and the interferon-stimulated genes *PSMB8*, *ISG15* and *IRF1* (**Figure 2C**;  
172 **Supplemental Table 2**).

173 The selected genes with the most negative regression coefficients, corresponding to lower  
174 expression in the Definite group, were: *FABP4*, encoding a fatty acid-binding protein considered  
175 a marker of alveolar macrophages, whose expression in the lung decreases in patients with LRTI,  
176 including COVID-19 (30–32); and *RBP4*, encoding a retinol-binding protein, whose expression in  
177 the lung has also been shown to sharply decrease following onset of LRTI(30) and whose  
178 expression by macrophages in vitro is depressed by inflammatory stimuli(33) (**Figure 2C**;  
179 **Supplemental Table 2**).

180 We examined the expression of the final classifier genes as a function of patient age to  
181 confirm that their selection was not influenced by the different age distributions of the Definite and  
182 No Evidence groups (**Supplemental Figure 3**). Reassuringly, we found no significant difference  
183 in the expression of the 14 genes when comparing No Evidence patients under the age of four  
184 (n=23; median age 1.3 years) and over the age of four (n=27; median age 12.5) (**Supplemental**  
185 **Table 3A**). Further, we found that expression of 12 of the genes remained significantly different  
186 when comparing only children under the age of four in the Definite (n=100; median age 0.4) and  
187 No Evidence (n=23; median age 1.3) groups (**Supplemental Table 3B**).

## 188 **Detection of pathogens by mNGS and definition of microbial classification features**

189 We proceeded to analyze the microbial mNGS data to nominate likely pathogens whose  
190 features could be integrated into the LRTI classifier to increase confidence in the results and  
191 whose identity could be used to guide treatment. We processed the TA samples alongside water  
192 controls through the CZ-ID metagenomic analysis pipeline to obtain a count matrix of microbial  
193 taxa. The water controls allowed us to generate a background count distribution for each taxon,  
194 which modeled the contribution of contamination by microbes present in the laboratory  
195 environment or reagents.

196 Viruses with known ability to cause LRTI that were present at an abundance statistically  
197 exceeding their background distribution were considered probable pathogens. By this criterion,  
198 we detected viruses in the lungs of 107/117 (91%) Definite patients, with RSV the most prevalent  
199 (**Figure 3A**). Among No Evidence patients, 8/50 (16%) also had viruses detected by mNGS,  
200 which were probably missed clinically in the absence of characteristic symptoms. We defined the  
201 summed abundance of all pathogenic viruses detected in a patient, measured in reads-per-million  
202 (rpM), as the patient's 'viral score' for later use in an integrated host/microbe classifier (**Figure**  
203 **3B**).

204 Because most Definite patients had a positive nasopharyngeal (NP) swab viral PCR test,  
205 we could compare the viruses detected by PCR and mNGS (**Supplemental Data 4**). The  
206 comparison was complicated, however, by the fact that PCR was performed on upper airway  
207 samples, so a virus detected by PCR was not necessarily present in the lower airway. Bearing  
208 this in mind, we found that 99/101 (98%) Definite patients with a viral PCR hit also had a virus  
209 detected by mNGS, and both approaches detected at least one virus in common in 91 (92%) of  
210 those patients (**Supplemental Figure 4A**). Most cases where NP swab PCR detected a virus,  
211 but mNGS did not, involved adenovirus (**Supplemental Figure 4B**). mNGS alone detected  
212 viruses in 8/16 (50%) Definite patients lacking a viral PCR hit (**Supplemental Figure 4A**). In a



213 subset of Definite patients where we performed viral PCR on the same TA samples subjected to  
214 mNGS (n=21), 96% of PCR hits were detected by mNGS (**Supplemental Table 4**).

215 Bacterial and fungal taxa in the mNGS data also underwent background filtering to retain  
216 only those present at an abundance statistically exceeding their background distribution based  
217 on water controls. Because incidental carriage of potentially pathogenic bacteria is common in  
218 children, we additionally applied a previously published algorithm to distinguish possible  
219 pathogens from commensals, called the rules-based model (RBM)(9, 22). The RBM identifies  
220 bacteria and fungi with known pathogenic potential that are relatively dominant in a sample  
221 (**Figure 3, C and D**), based on the principle that uncontrolled growth of a pathogen leads to  
222 reduced lung microbiome alpha diversity in the context of LRTI(22, 34–36) (**Supplemental Figure**  
223 **4, C and D**).

224 The RBM identified possible bacterial/fungal pathogens in 78/117 (66%) Definite patients,  
225 with the most common being *H. influenzae*, *Moraxella catarrhalis* and *Streptococcus pneumoniae*  
226 (**Figure 3E**). The RBM also identified potential bacterial/fungal pathogens in 17/50 (34%) No  
227 Evidence patients. Patients in the Definite group with an RBM-identified pathogen exhibited  
228 markedly lower bacterial alpha diversity compared to Definite patients without an RBM-identified  
229 pathogen and compared to No Evidence patients (**Supplemental Figure 4D**). In contrast, No  
230 Evidence patients with an RBM-identified pathogen did not typically exhibit a loss of bacterial  
231 alpha diversity (**Supplemental Figure 4D**), and in such cases the RBM-identified species was far  
232 less dominant (**Figure 3F**). We therefore defined the patient's 'bacterial score' for use in an  
233 integrated host/microbe classifier as the proportion of the RBM-identified pathogens out of all non-  
234 host counts, a measure of relative dominance (**Figure 3F**).

235 We next sought to compare the bacterial and fungal pathogens identified by mNGS with  
236 those found by culture of TA samples in the Definite patients (**Supplemental Data 4**). Importantly,  
237 mNGS can detect organisms that are challenging to grow in culture or are inhibited by previous  
238 antibiotic treatment, and the RBM selects the likeliest pathogen based on a global view of the

239 microbiome. Despite these inherent differences between culture and the RBM, we found that in  
240 44/63 (70%) Definite patients who had a positive culture, at least one pathogen identified by the  
241 RBM was also found by culture (**Supplemental Figure 4E**). In the remaining 19 patients, the  
242 RBM identified a different species than culture (n=7), or no pathogen at all (n=12). Even in these  
243 cases, the species grown in culture was usually present in the mNGS data, but other species  
244 were more dominant (**Supplemental Figure 4E**). The RBM also identified a potential pathogen  
245 in 27/54 (50%) Definite patients lacking a positive culture (**Supplemental Figure 4E**). Most cases  
246 where the species grown in culture was absent from the mNGS data after background filtering  
247 involved *Staphylococcus aureus*, *Streptococcus* species other than *S. pneumoniae*, and  
248 *Escherichia coli* (**Supplemental Figure 4F**).

#### 249 **Host gene expression differences between viral and bacterial LRTI**

250 Overall, mNGS identified viral and/or bacterial pathogens in 114/117 (97%) Definite  
251 patients. Having established by mNGS which Definite patients had an exclusively bacterial  
252 infection (n=7), an exclusively viral infection (n=36), or a viral/bacterial co-infection (n=71), we  
253 went back and examined how effectively the top host classifier genes captured these different  
254 scenarios (**Supplemental Figure 5A**). As expected, some of the interferon-stimulated genes  
255 (e.g., *ISG15*) provided much more discriminating power for Definite patients with a viral infection  
256 as compared to those with a purely bacterial infection. Reassuringly, however, several other  
257 classifier genes behaved similarly regardless of the underlying infection type.

258 We then asked more broadly whether host gene expression differed between patients with  
259 any bacterial LRTI (including viral co-infection) and patients with purely viral LRTI. We identified  
260 108 differentially expressed genes at a Benjamini-Hochberg adjusted  $p < 0.05$  (**Supplemental**  
261 **Figure 5B; Supplemental Data 2**), and found that genes related to neutrophil degranulation and  
262 cytokine signaling were enriched in patients with any bacterial LRTI (**Supplemental Figure 5C**;

263 **Supplemental Data 3**). These results suggest the potential for developing in future work a rule-  
264 out classifier for bacterial infection that could be used to limit unnecessary antibiotic usage.

### 265 **Classification of LRTI status based on integration of host and microbial features**

266 Next, we asked whether integrating the host and microbial features could improve the  
267 performance of metagenomic LRTI classification. We fit a logistic regression model on the  
268 following three features: i) the LRTI probability output of the host classifier, ii) the summed  
269 abundance, measured in reads-per-million (rpM), of any pathogenic viruses present after  
270 background filtering ('viral score'), and iii) the proportion of the potentially pathogenic  
271 bacteria/fungi identified by the RBM out of all non-host read counts ('bacterial score') (**Figure 4A**).  
272 As expected, the host and microbial features were correlated across most samples, but some  
273 notable exceptions were observed (**Supplemental Figure 6**).

274 The integrated classifier achieved an AUC of 0.986 (range: 0.953-1.000) when assessed  
275 by 5-fold cross-validation (**Figure 4B; Supplemental Table 5**), applying the same train/test splits  
276 used in the host-only cross-validation. Using an out-of-fold probability threshold of 50%, the  
277 integrated classifier assigned 109/117 (93%) Definite patients as LRTI+ and 44/50 (88%) No  
278 Evidence patients as LRTI- (**Figure 4C; Supplemental Table 6**). Compared to the host-only  
279 classifier, a net of five additional patients were now classified according to their clinical  
280 adjudication and the confidence of patient classifications increased, as reflected by more extreme  
281 output probabilities (**Figure 4D**). We note that at a much lower out-of-fold probability threshold of  
282 15%, the integrated classifier's sensitivity for LRTI in the Definite group rose to >98%, suggesting  
283 a use-case as a rule-out test for LRTI.

284 Finally, we trained the integrated host/microbe classifier on all the Definite and No  
285 Evidence patients and then applied it to the Suspected and Indeterminate patients, whose clinical  
286 diagnosis was less certain. The integrated classifier indicated 37/57 (65%) Suspected patients  
287 were LRTI+ compared with 12/37 (32%) Indeterminate patients (**Figure 5A**), consistent with the

288 stronger clinical suspicion of LRTI in the former group. Across all 52 patients classified as LRTI+  
289 in these two groups, likely pathogens (viral, bacterial, or fungal) were identified in 51 patients  
290 (98%). Pathogens detected included common (e.g., rhinovirus, *H. influenzae*), uncommon (e.g.,  
291 bocavirus, parechovirus), and difficult to culture (e.g., *Mycoplasma pneumoniae*) microbes  
292 (**Figure 5B**). We also designed a visual summary incorporating all three inputs of the integrated  
293 classifier and its output LRTI probability (**Figure 5C**).

294

## 295 **DISCUSSION**

296 Lower respiratory tract infection (LRTI) involves a dynamic relationship between pathogen,  
297 lung microbiome and host response that is not captured by existing clinical diagnostic tests. Here,  
298 we demonstrate that mNGS of lower respiratory samples enables accurate LRTI diagnosis based  
299 on features of each of these key elements in critically ill children, a demographic facing a high  
300 burden of LRTI. We build on proof-of-concept work in adults(22) to develop the first fully integrated  
301 host/microbe LRTI diagnostic classifier, and validate its performance in a large, multicenter  
302 prospective cohort.

303 Incidental carriage of pathogens in the respiratory tract is common in children(3, 5, 9–12).  
304 Consistent with this, detection of a pathogen by mNGS was in many cases insufficient for accurate  
305 LRTI diagnosis in our cohort. Among No Evidence patients, 40% had potentially pathogenic  
306 microbes detected by mNGS even after application of the RBM (for bacteria and fungi). This is  
307 notably different from adults, for whom both clinical and metagenomic studies have demonstrated  
308 much lower rates of incidental pathogen carriage(7, 22). Profiling the host response is thus  
309 particularly important for pediatric LRTI diagnosis, as it provides evidence of an immune response  
310 to infection.

311 Remarkably, an LRTI diagnostic classifier based on host gene expression performed very  
312 well on its own, with a median AUC of 0.967 by cross-validation. The host signature was driven  
313 by activation markers of T cells, alveolar macrophages, and the interferon response, and

314 successfully captured cases of viral infection, bacterial infection, or co-infection. This performance  
315 suggests the gene signature could be incorporated into a clinical PCR assay as a standalone  
316 rapid diagnostic. It is likely that an even more parsimonious signature than the one used in the  
317 mNGS classifier would suffice, as six genes exhibited the most discriminating power.

318 The integrated host/microbe classifier achieved a median AUC of 0.986 by cross-  
319 validation. The incorporation of microbial features increased the confidence of LRTI classification,  
320 even though relatively few patients switched their assigned diagnosis. It is likely that the integrated  
321 classification approach will prove even more valuable in settings where the host signature may  
322 not perform as well on its own (e.g., immune-compromised patients), and will generalize better to  
323 future cohorts. Moreover, it provides clinicians with a unified framework both for LRTI diagnosis  
324 and etiologic pathogen identification.

325 Unlike for host gene expression, the microbial features in the integrated classifier were not  
326 automatically selected by training on identified taxa and their features in the Definite and No  
327 Evidence groups. Such an approach was not feasible given the sparse presence of individual  
328 respiratory pathogens across patients in the cohort, especially in the No Evidence group. As larger  
329 datasets are generated, it may be possible to use machine learning approaches to capture the  
330 'null distribution' of incidentally carried pathogens in the lower respiratory tract and identify outlier  
331 cases that signal LRTI. Even then, designating a specific microbe as a 'true' causal pathogen for  
332 training purposes would be non-trivial, especially in cases of co-infection. Instead, we defined  
333 summary viral and bacterial scores motivated by accumulated clinical and microbiologic  
334 knowledge. For bacteria and fungi, we took advantage of the collapse of lung microbiome diversity  
335 in the setting of pathogen dominance, an established feature of LRTI(22, 34, 35).

336 Comparison of mNGS and clinical microbiologic testing was complicated by inherent  
337 differences in the anatomical site of testing (upper respiratory viral PCR vs. lower respiratory  
338 mNGS) or the question addressed (growth in culture vs. dominance by mNGS), as well as by  
339 heterogeneity in microbiologic practices among study sites. Nevertheless, when clinical testing

340 identified a microbe, it was in most cases present in the mNGS data. A notable exception was  
341 adenovirus, which was consistently absent by mNGS when detected by NP swab PCR. This could  
342 reflect sensitivity limitations of RNA-sequencing for a DNA virus or true absence in the lower  
343 airway. Our secondary analysis revealing higher concordance of PCR and mNGS when  
344 performed on the same lower respiratory specimens, however, argues for the latter possibility.  
345 Future work could examine targeted enrichment strategies(37, 38) to improve detection of this or  
346 any other pathogen that proves challenging to capture by mNGS. Regardless, our findings  
347 highlight the value of concomitant assessment of the host response, which can accurately inform  
348 LRTI status even when pathogens are not detected.

349 A key advantage of mNGS is the capacity to provide a microbiologic diagnosis when  
350 traditional clinical testing returns negative, as in an estimated 20-60% of suspected community-  
351 or hospital-acquired pneumonia cases(3, 6–8). Indeed, the integrated mNGS classifier confirmed  
352 LRTI in 65% of children with suspected infection but negative clinician-ordered testing in our  
353 cohort, and in 32% of patients with respiratory failure of indeterminate etiology. It also provided a  
354 microbiologic diagnosis in all but one of these patients, highlighting the potential to inform  
355 pathogen-targeted versus empirical treatment.

356 Acute respiratory illnesses are a leading contributor to inappropriate antimicrobial use, a  
357 practice driven by challenges distinguishing LRTI from non-infectious causes of respiratory failure  
358 or distinguishing bacterial from viral LRTI. Reflecting this is the observation that 90% of children  
359 in our cohort received empiric antimicrobials by the time of sample collection, including 84% in  
360 the No Evidence group. Host/microbe mNGS offers an opportunity for improved antimicrobial  
361 stewardship, particularly in clinically uncertain cases, by providing a probability of infection and  
362 by nominating the likely pathogen. In fact, we found that the integrated classifier could be tuned  
363 to achieve >98% sensitivity for LRTI detection, highlighting its potential use as a rule-out test to  
364 help exclude the need for antimicrobials. Moreover, our host gene expression analysis revealed  
365 potential for development of a host classifier specifically for bacterial infection.

366 Our study has several limitations that should be kept in mind. In developing the mNGS  
367 classifiers, we relied on retrospective clinical adjudication for designating the ‘ground truth’ LRTI  
368 status of patients in the cohort. Retrospective adjudication, which considers the context of patient  
369 trajectory and clinical data not available at the time of initial admission, was the only practical  
370 approach. However, by nature, it is not infallible and was subject to variability in clinical and  
371 microbiologic practices across study sites and to the known limitations of standard microbiologic  
372 diagnostics. Moreover, comprehensive microbiologic testing was not always performed in the No  
373 Evidence group in the absence of clinical suspicion of LRTI, which likely allowed a few patients  
374 into this group who were suffering from unrecognized infection on top of their primary diagnosis.  
375 It is thus likely that some No Evidence patients deemed LRTI+ by the mNGS classifier were not  
376 truly misclassified, but rather incorrectly adjudicated. Study limitations also include the different  
377 age distributions of comparator groups and the relative paucity of purely bacterial infections.

378 mNGS provides a broad screen for bacteria, viruses, and other pathogens to overcome  
379 the limitations of traditional clinical microbiologic tests. Assays utilizing this technique are already  
380 in use in hospitals for microbe detection in typically sterile compartments, such as blood (sepsis)  
381 and cerebrospinal fluid (meningitis), with turnaround of  $\leq 48$  hours(39, 40). mNGS promises to  
382 improve the diagnosis and treatment of respiratory infections as well(9, 22, 41–45), but has not  
383 yet seen clinical translation in this area. Respiratory samples present a special challenge since  
384 they harbor microbial communities, including potential pathogens, even in states of health. Host  
385 gene expression can help distinguish bona fide infection, and several studies have demonstrated  
386 the utility of blood transcriptional profiling for this purpose(16, 17, 20). However, this approach  
387 precludes identification of the etiologic respiratory pathogens. Simultaneous analysis of host and  
388 microbe in respiratory samples informs both questions, and is increasingly being applied in  
389 studies of the upper and lower airway(22, 46–48). Our work now provides the first fully integrated  
390 host/microbe LRTI diagnostic classifier from lower airway mNGS, applicable across pathogen  
391 types, thus setting the stage for clinical implementation in the relatively near future.

392 We envision the approach for LRTI diagnosis by lower airway host/microbe mNGS  
393 outlined in this study being used at the time of intubation for critically ill children with acute  
394 respiratory failure, as a complement to traditional culture and PCR-based microbiologic testing.  
395 Our approach would need to be independently validated and its impact on clinical outcomes would  
396 need to be evaluated in a randomized clinical trial before deployment in the hospital. Future work  
397 should also examine the trajectory of patient LRTI classification over time, as infection resolves,  
398 and how well the classifier might generalize to a similarly large and heterogeneous adult cohort.

399

## 400 **METHODS**

### 401 **Study cohort**

402 We conducted a secondary analysis of a prospective cohort study of mechanically  
403 ventilated children admitted to eight Pediatric Intensive Care units in the National Institute of Child  
404 Health and Human Development's Collaborative Pediatric Critical Care Research Network  
405 (CPCCRN) from February 2015 to December 2017(9, 25).

406 We enrolled children aged 31 days to 18 years who were expected to require mechanical  
407 ventilation (MV) via endotracheal tube (ETT) for at least 72 hours. Exclusion criteria included  
408 inability to obtain a tracheal aspirate (TA) sample from the subject within 24 hours of intubation;  
409 presence of a tracheostomy tube or plans to place one; any condition in which deep tracheal  
410 suctioning was contraindicated; previous episode of MV during the hospitalization; family/team  
411 lack of commitment to aggressive intensive care as indicated by 'do not resuscitate' orders and/or  
412 other limitation of care; or previous enrollment into this study. Some patients were ultimately  
413 excluded from the present analysis based on sequencing metrics, as described in the following.

414 Parents or other legal guardians of eligible patients were approached for consent by study-  
415 trained staff as soon as possible after intubation. Waiver of consent was granted for TA samples  
416 to be obtained from standard-of-care suctioning of the ETT until the parents or guardians could  
417 be approached for informed consent.



418 Prospectively collected clinical data were recorded in a web-based research database  
419 maintained by the CPCCRN data coordinating center at the University of Utah.

#### 420 **Clinical microbiologic diagnostics**

421 Enrolled patients received standard-of-care clinical respiratory microbiologic diagnostics,  
422 as ordered by treating clinicians at each study site. These diagnostics included nasopharyngeal  
423 (NP) swab respiratory viral testing by multiplex PCR and/or tracheal aspirate (TA) bacterial and  
424 fungal semi-quantitative cultures. Clinical diagnostic tests on samples obtained within 48 hours of  
425 intubation were included in the analyses. Microbes reported by the clinical laboratory as  
426 representing laboratory, skin, or environmental contaminants, or reported as mixed upper  
427 respiratory flora, were excluded.

#### 428 **Adjudication of LRTI status**

429 Adjudication of LRTI status was blinded to the mNGS results and depended on the  
430 combination of two elements: i) a retrospective clinical diagnosis made by study-site clinicians,  
431 who reviewed all clinical, laboratory and imaging data available at the end of the admission, and  
432 ii) any standard-of-care microbiologic diagnostics performed during the admission  
433 (nasopharyngeal swab viral PCR and/or TA culture). Following a recently described approach(9,  
434 16, 22), study team physicians ultimately assigned patients into one of four groups: i) Definite, if  
435 clinicians made a diagnosis of LRTI and the patient had clinical microbiologic findings; ii)  
436 Suspected, if clinicians made a diagnosis of LRTI but there were no microbiologic findings; iii)  
437 Indeterminate, if no diagnosis of LRTI was made despite some microbiologic findings; and iv) No  
438 Evidence, if clinicians identified a clear non-infectious cause of acute respiratory failure and no  
439 clinical or microbiologic suspicion of LRTI arose. We note that comprehensive microbiologic  
440 testing was not always performed in the No Evidence group in the absence of clinical suspicion.

#### 441 **Sample collection, processing and mNGS**

442 Tracheal aspirate (TA) was collected within 24 hours of intubation, mixed 1:1 with  
443 DNA/RNA Shield (Zymo) and frozen at -80°C. RNA was extracted from 300µl of patient TA using  
444 bead-based lysis and the Allprep DNA/RNA kit (Qiagen), which included a DNase treatment step.  
445 RNA was reverse transcribed to generate cDNA, and sequencing library preparation was  
446 performed using the NEBNext Ultra II Library Prep Kit. RNA-Seq libraries underwent 150bp  
447 paired-end sequencing on an Illumina Novaseq 6000 instrument.

#### 448 **Host gene expression analysis**

449 Following de-multiplexing, sequencing reads were pseudo-aligned with kallisto(49)  
450 (including bias correction) to an index consisting of all transcripts associated with human protein  
451 coding and long non-coding RNA genes (ENSEMBL v.99). We excluded samples with less than  
452 500,000 estimated counts associated with transcripts of protein-coding genes. Gene-level counts  
453 were generated from the transcript-level abundance estimates using the R package tximport(50),  
454 with the scaledTPM method.

455 Genes were retained for differential expression (DE) analysis if they had at least 10 counts  
456 in at least 20% of the samples included in the analysis. DE analyses were performed with the R  
457 package limma(51), using quantile normalization and the voom method. P-values were calculated  
458 using moderated t-tests, as implemented in limma, and adjusted for multiple hypothesis testing  
459 with the Benjamini-Hochberg method. Tests with  $p < 0.05$  were considered significant. Full DE  
460 results comparing: i) Definite and No Evidence patients, and ii) Definite patients with any bacterial  
461 LRTI and with purely viral LRTI are provided as **Supplemental Data 2**.

462 Gene set enrichment analyses (GSEA)(52) were performed using the fgseaMultilevel  
463 function in the R package fgsea(53), which calculates pathway p-values using an adaptive,  
464 multilevel splitting Monte Carlo approach. The analysis was applied to REACTOME(54) pathways  
465 with a minimum size of 10 genes and a maximum size of 1,500 genes. All genes from the  
466 respective DE analysis were included as input, pre-ranked by the DE test statistic. The gene sets

467 shown in the figures were manually selected to reduce redundancy and highlight diverse  
468 biological functions from among those with a Benjamini-Hochberg adjusted  $p < 0.05$ . Full GSEA  
469 results are provided as **Supplemental Data 3**.

### **Classification of LRTI status based on host gene expression features**

470 Genes with at least 10 counts in at least 20% of the Definite (n=117) and No Evidence  
471 (n=50) patients were used as input for the host-based LRTI classification (n=13,323). We applied  
472 a variance-stabilizing transformation to the gene counts, as implemented in the R package  
473 DESeq2(55).

474 We implemented a 5-fold cross-validation procedure such that in each train/test split, we  
475 i) used lasso logistic regression on the samples in the training folds for feature (gene) selection,  
476 ii) trained a random forest classifier on the samples in the training folds using only the selected  
477 features, and iii) applied the random forest classifier to the samples in the test fold to obtain an  
478 out-of-fold host probability of LRTI. We required at least 9 No Evidence patients in each of the  
479 folds to ensure sufficient negative samples in each test set.

480 Simple lasso logistic regression was fit using the `cv.glmnet(family='binomial')` function  
481 from the R package `glmnet`(56), leaving all other parameters at their defaults. We used the 1se  
482 criterion for selecting the tuning parameter, which picks the sparsest value of the tuning parameter  
483 that lies within 1 standard error of the optimum. When evaluating test error, we selected the tuning  
484 parameter via nested cross-validation within the training set only.

485 Random forest was implemented using the R package `randomForest`(57). We used  
486 10,000 trees and left all parameters at their defaults.

487 The area under the receiver operating characteristic curve (AUC) for each test fold was  
488 calculated using the R package `pROC`(58) with default behavior. Sensitivity and specificity were  
489 calculated using a pre-determined 50% out-of-fold LRTI probability threshold.

## 490 **Detection of microbes by mNGS and background filtering**

491 We processed patient TA samples alongside water controls through the open-source CZ-  
492 ID (formerly called IDSeq) metagenomic analysis pipeline(59). The pipeline performs subtractive  
493 alignment of the human genome and then reference-based alignment of the remaining reads at  
494 both the nucleotide and amino acid level against sequences in the National Center for  
495 Biotechnology Information (NCBI) nucleotide (NT) and non-redundant (NR) databases,  
496 respectively. This is followed by assembly of the reads matching each taxon. Taxa with  $\geq 5$  read  
497 counts in the NT alignment and an average assembly nucleotide alignment  $\geq 70$ bp were retained  
498 for downstream analysis.

499 Water controls enabled estimation of the number of background reads expected for each  
500 taxon, as previously described(9, 47). This was done by modeling the number of background  
501 reads as a negative binomial distribution with mean and dispersion fitted on the water controls.  
502 For each batch (sequencing run) and taxon, we estimated the mean parameter of the negative  
503 binomial distribution by averaging the read counts across the water controls after normalizing by  
504 the total non-host reads, slightly regularizing this estimate by including the global average (across  
505 all batches) as an additional sample. We estimated a single dispersion parameter across all taxa  
506 and batches using the functions `glm.nb()` and `theta.md()` from the R package MASS(60). Taxa  
507 were then tested for whether they exceeded the count expected from the background distribution,  
508 and a Benjamini-Hochberg adjustment was applied to all tests performed in the same sample.  
509 Taxa were considered present in a sample if they achieved an adjusted  $p < 0.05$ .

510 Any virus with known ability to cause LRTI, based on a previously conducted literature  
511 curation(22), that was present in a patient sample after background filtering was considered a  
512 probable pathogen.

## 513 **Rules-based model (RBM)**

514 For bacteria and fungi that were present after background filtering, we additionally applied  
515 a rules-based algorithm for distinguishing potential pathogens from likely commensals, which was

516 slightly adapted from its previously published version(22). Application of the RBM in each sample  
517 involved the following steps:

- 518 1. We retained only the most abundant bacterial/fungal species from each genus. In case a  
519 less abundant species in the genus had known ability to cause LRTI, based on a previously  
520 conducted literature curation(22), we retained it too.
- 521 2. We then ranked the retained species from greatest to least overall abundance in the sample  
522 and limited, at most, to the top 15.
- 523 3. The largest drop in abundance between the ranked species in the sample was identified.
- 524 4. If any species above the largest drop in abundance had known ability to cause LRTI, it was  
525 deemed a potential pathogen.

#### 526 **Analysis of microbiome diversity**

527 The Shannon diversity index was calculated using either all viral and bacterial taxa, or  
528 only bacterial taxa, that were present after background filtering using the R package Vegan(61).  
529 Two-sided Mann-Whitney tests with Bonferroni correction were used to evaluate statistical  
530 significance of group differences. Tests with  $p < 0.05$  were considered significant.

#### 531 **Classification of LRTI status based on integration of host and microbial features**

532 For the integrated host/microbe LRTI classifier, we fit a logistic regression model on the  
533 following features: i) the host LRTI probability; ii) the summed abundance, measured in reads-  
534 per-million (rpM), of any pathogenic viruses present after background filtering ('viral score'); and  
535 iii) the proportion of any potentially pathogenic bacteria/fungi identified by the RBM out of all non-  
536 host read counts ('bacterial score'). To avoid any leakage from the test set affecting the host  
537 probabilities, we always used the out-of-bag 'votes' from the host random forest classifier as the  
538 host probabilities of the training samples.

539 Before fitting the integrated classifier, we applied transformations to all three features. A  
540 logistic (log-odds) transformation was applied to the host probabilities:  $\ln \frac{P(LRTI)}{1-P(LRTI)}$ . To facilitate

541 this transformation, we first slightly regularized the host probabilities and their complementary  
542 probabilities away from 0 and 1 by a quantity inversely proportional to the number of random  
543 forest trees used in the host classifier ( $RF_{trees} = 10,000$ ):

$$544 \quad P(LRTI) \leftarrow P(LRTI) \cdot \frac{RF_{trees}}{RF_{trees} + 1} + \frac{1}{RF_{trees} + 1}$$

$$545 \quad [1 - P(LRTI)] \leftarrow [1 - P(LRTI)] \cdot \frac{RF_{trees}}{RF_{trees} + 1} + \frac{1}{RF_{trees} + 1}$$

546 For the viral/bacterial scores, we applied a  $\log_{10}$  transformation. In order to avoid taking  
547 the log of 0, we added a small uniform quantity to the scores of all the samples, which was  
548 calculated by taking the minimum non-zero viral or bacterial score, respectively, in the  
549 corresponding training set and dividing it by 10.

550 Performance of the integrated classifier was evaluated on the Definite and No Evidence  
551 patients using 5-fold cross-validation, with the same train/test splits and the same per-split host  
552 classifiers as in the host-only cross-validation. The area under the receiver operating  
553 characteristic curve (AUC) for each test fold was calculated using the R package pROC(58) with  
554 default behavior. Sensitivity and specificity were calculated using a pre-determined 50% out-of-  
555 fold LRTI probability threshold.

556 The integrated classifier was then trained on all the Definite and No Evidence patients and  
557 applied to the Suspected and Indeterminate patients.

558

## 559 Statistics

560 This study implemented a 5-fold cross-validation scheme to develop and evaluate  
561 performance of a binary classifier using samples with presumed known labels. Algorithms used  
562 in the classification procedure included logistic regression and random forest, which generate a  
563 probabilistic classification output. The area under the receiver operating characteristic curve, as  
564 well as sensitivity and specificity at a pre-determined probability threshold of 0.5, were used as

565 performance metrics. Detailed descriptions of each statistical analysis are included in the  
566 corresponding sections of the Methods and in the figure and table legends.

567

#### 568 Study approval

569 The original cohort study was approved by the Collaborative Pediatric Critical Care  
570 Research IRB at the University of Utah (protocol #00088656). Informed consent was obtained  
571 from parents or other legal guardians, which included permission for collected specimens and  
572 data to be used in future studies.

573

#### 574 Data and code availability

575 Raw FASTQ files are protected due to patient privacy concerns. Processed host gene  
576 counts are available in the NCBI Gene Expression Omnibus (GEO) database under accession  
577 [GSE212532](#). FASTQ files containing non-host reads identified by the CZ-ID pipeline, following  
578 subtraction of reads aligning to the human genome, are available in the NCBI Sequence Read  
579 Archive (SRA) database under BioProject accession [PRJNA875913](#). All data, code, and results  
580 related to development and validation of the mNGS classifier, including the microbial taxon  
581 counts, are available at: <https://github.com/eranmick/pediatric-mNGS-LRTI-classifier>.  
582 Supplementary data files are provided with this publication.

583

#### 584 **Author contributions**

585 EM, AT, JK, KLK, JLD, PMM, and CRL contributed to study conception and overall design.  
586 SC, AL, MT, AMD, NN, and CRL oversaw or performed sample processing, library preparation,  
587 and sequencing. EM, AT, JK, CMO, KMW, VS, ABM, BDW, LA, and CRL oversaw or performed  
588 collation and annotation of patient metadata. CMO, ABM, TC, PMM, and CRL contributed to  
589 patient clinical adjudication. JK designed the underlying cross-validation scheme. EM, AT, JK,  
590 and CRL performed all data analyses and data visualizations. KLK contributed to implementation

591 of the rules-based model. LA contributed to project administration and coordination. EM, AT,  
592 PMM, and CRL wrote the manuscript with input from all authors. ML, ABM, EAFS, TC, and BDW  
593 provided advice and feedback throughout the study. PMM and CRL jointly supervised the study.

594 EM, AT, and JK are listed as co-first authors due to equal contribution to the study, with  
595 the order of appearance determined alphabetically by last name except in the case of JK who had  
596 departed the group by the time of manuscript preparation.

597

## 598 **Acknowledgements**

599 We thank all subjects and their families for participating in this study. We acknowledge the  
600 contributions of Tammara L. Jenkins, MSN, RN, and Robert F. Tamburro, MD, from Eunice  
601 Kennedy Shriver National Institute of Child Health and Human Development, Bethesda, MD.

602 The following is a summary of study sites where patients were enrolled, principal  
603 investigators (PI), co-investigators (CI) and research coordinators (RC). Children's Hospital of  
604 Colorado, Aurora, CO: Peter Mourani (PI); Todd Carpenter (CI); Yamila Sierra (RC); Katheryn  
605 Malone (RC), Diane Ladell (RC); Kimberly Ralston (RC); Kevin Van (RC). Children's Hospital of  
606 Michigan, Detroit, MI: Kathleen L. Meert (PI); Sabrina Heidemann (CI); Ann Pawluszka (RC);  
607 Melanie Lulic (RC). Children's Hospital of Philadelphia, Philadelphia, PA: Robert A Berg (PI);  
608 Athena Zuppa (CI); Carolann Twelves (RC); Mary Ann DiLiberto (RC). Children's National Medical  
609 Center, Washington, DC: Murray Pollack (PI); David Wessel (PI); Randall Burd (CI); Elyse  
610 Tomanio (RC); Diane Hession (RC); Ashley Wolfe (RC). Nationwide Children's Hospital,  
611 Columbus, OH: Mark Hall (PI); Andrew Yates (CI); Lisa Steele (RC); Maggie Flowers (RC); Josey  
612 Hensley (RC). Mattel Children's Hospital, University of California Los Angeles, Los Angeles, CA:  
613 Anil Sapru (PI); Rick Harrison (CI), Neda Ashtari (RC); Anna Ratiu (RC). Children's Hospital of  
614 Pittsburgh, University of Pittsburgh Medical Center, Pittsburgh, PA: Joe Carcillo (PI); Ericka Fink  
615 (CI); Leighann Koch (RC); Alan Abraham (RC). Benioff Children's Hospital, University of  
616 California, San Francisco, San Francisco, CA: Patrick McQuillen (PI); Anne McKenzie (RC);



617 Yensy Zetino (RC). We also acknowledge the support of the University of Utah Data Coordinating  
618 Center, Salt Lake City, Utah: Mike Dean (PI); Richard Holubkov (PI), Juhee Peterson, Melissa  
619 Bolton, Whit Coleman, and Stephanie Dorton.

620 This study was supported in part by the following cooperative agreements from the Eunice  
621 Kennedy Shriver National Institute of Child Health and Human Development and the National  
622 Heart, Lung and Blood Institute: UG1HD083171 (Dr. Mourani), 1R01HL124103 (Drs. Mourani and  
623 Sontag), UG1HD049983 (Dr. Carcillo), UG01HD049934 (Drs. Reeder, Locandro, and Dean),  
624 UG1HD083170 (Dr. Hall), UG1HD050096 (Dr. Meert), UG1HD63108 (Dr. Zuppa),  
625 UG1HD083116 (Dr. Sapru), UG1HD083166 (Dr. McQuillen), UG1HD049981 (Dr. Pollack),  
626 K23HL138461-01A1 and 5R01HL155418-02 (Dr. Langelier). The study was also supported by  
627 funding from the Chan Zuckerberg Biohub (Dr. Langelier). Study sponsors were not involved in  
628 study design; in the collection, analysis, and interpretation of data; in the writing of the report; and  
629 in the decision to submit the report for publication.

630

### 631 **Conflict of interest statement**

632 EM, AT, JK, KLK, PMM, and CRL are listed as inventors on a patent application  
633 (63/381,156) related to the diagnosis of lower respiratory tract infections filed by the University of  
634 California, San Francisco and the Chan Zuckerberg Biohub.

635

### 636 **References**

- 637 1. World Health Organization. The top 10 causes of death. [https://www.who.int/news-room/fact-](https://www.who.int/news-room/fact-sheets/detail/the-top-10-causes-of-death)  
638 [sheets/detail/the-top-10-causes-of-death](https://www.who.int/news-room/fact-sheets/detail/the-top-10-causes-of-death).
- 639 2. U.S. Centers for Disease Control and Prevention. Leading Causes of Death 2022.  
640 <https://www.cdc.gov/nchs/fastats/leading-causes-of-death.htm>.
- 641 3. Jain S et al. Community-acquired pneumonia among U.S. children. *N. Engl. J. Med.*  
642 2015;372(22):2167–2168.

- 643 4. Liu L et al. Global, regional, and national causes of under-5 mortality in 2000-15: an updated  
644 systematic analysis with implications for the Sustainable Development Goals. *The Lancet*  
645 2016;388(10063):3027–3035.
- 646 5. O'Brien KL et al. Causes of severe pneumonia requiring hospital admission in children without  
647 HIV infection from Africa and Asia: the PERCH multi-country case-control study. *The Lancet*  
648 2019;394(10200):757–779.
- 649 6. Michelow IC et al. Epidemiology and clinical characteristics of community-acquired pneumonia  
650 in hospitalized children. *Pediatrics* 2004;113(4):701–707.
- 651 7. Jain S et al. Community-Acquired Pneumonia Requiring Hospitalization among U.S. Adults. *N.*  
652 *Engl. J. Med.* 2015;373(5):415–427.
- 653 8. Magill SS et al. Changes in Prevalence of Health Care–Associated Infections in U.S. Hospitals.  
654 *N. Engl. J. Med.* 2018;379(18):1732–1744.
- 655 9. Tsitsiklis A et al. Lower respiratory tract infections in children requiring mechanical ventilation:  
656 a multicentre prospective surveillance study incorporating airway metagenomics. *Lancet Microbe*  
657 2022;3(4):e284–e293.
- 658 10. S H et al. Rhinovirus Detection in Symptomatic and Asymptomatic Children: Value of Host  
659 Transcriptome Analysis. *Am. J. Respir. Crit. Care Med.* 2016;193(7).
- 660 11. Hf W et al. The role of nasal carriage in *Staphylococcus aureus* infections. *Lancet Infect. Dis.*  
661 2005;5(12).
- 662 12. Schlaberg R et al. Viral Pathogen Detection by Metagenomics and Pan-Viral Group  
663 Polymerase Chain Reaction in Children With Pneumonia Lacking Identifiable Etiology. *J. Infect.*  
664 *Dis.* 2017;215(9):1407–1415.
- 665 13. Baggs J, Fridkin SK, Pollack LA, Srinivasan A, Jernigan JA. Estimating National Trends in  
666 Inpatient Antibiotic Use Among US Hospitals From 2006 to 2012. *JAMA Intern. Med.*  
667 2016;176(11):1639–1648.

- 668 14. Tamma PD, Avdic E, Li DX, Dzintars K, Cosgrove SE. Association of Adverse Events With  
669 Antibiotic Use in Hospitalized Patients. *JAMA Intern. Med.* 2017;177(9):1308–1315.
- 670 15. Zaas AK et al. The current epidemiology and clinical decisions surrounding acute respiratory  
671 infections. *Trends Mol. Med.* 2014;20(10):579–588.
- 672 16. Tsalik EL et al. Host gene expression classifiers diagnose acute respiratory illness etiology.  
673 *Sci. Transl. Med.* 2016;8(322):322ra11.
- 674 17. Zaas AK et al. Gene expression signatures diagnose influenza and other symptomatic  
675 respiratory viral infections in humans. *Cell Host Microbe* 2009;6(3):207–217.
- 676 18. Suarez NM et al. Superiority of Transcriptional Profiling Over Procalcitonin for Distinguishing  
677 Bacterial From Viral Lower Respiratory Tract Infections in Hospitalized Adults. *J. Infect. Dis.*  
678 2015;212(2):213–222.
- 679 19. Sweeney TE, Wong HR, Khatri P. Robust classification of bacterial and viral infections via  
680 integrated host gene expression diagnostics. *Sci. Transl. Med.* 2016;8(346):346ra91.
- 681 20. Chawla DG et al. Benchmarking transcriptional host response signatures for infection  
682 diagnosis. *Cell Syst.* 2022;13(12):974-988.e7.
- 683 21. Tsalik EL et al. Discriminating Bacterial and Viral Infection Using a Rapid Host Gene  
684 Expression Test. *Crit. Care Med.* 2021;49(10):1651–1663.
- 685 22. Langelier C et al. Integrating host response and unbiased microbe detection for lower  
686 respiratory tract infection diagnosis in critically ill adults. *Proc. Natl. Acad. Sci. U. S. A.*  
687 2018;115(52):E12353–E12362.
- 688 23. Mick E et al. Upper airway gene expression shows a more robust adaptive immune response  
689 to SARS-CoV-2 in children. *Nat. Commun.* 2022;13(1):3937.
- 690 24. Molony RD et al. Aging impairs both primary and secondary RIG-I signaling for interferon  
691 induction in human monocytes. *Sci. Signal.* 2017;10(509):eaan2392.
- 692 25. Mourani PM et al. Temporal airway microbiome changes related to ventilator associated  
693 pneumonia in children. *Eur. Respir. J.* 2021;57(3):2001829.

- 694 26. Krensky AM, Clayberger C. Biology and clinical relevance of granulysin. *Tissue Antigens*  
695 2009;73(3):193–198.
- 696 27. Nakaya M et al. Inflammatory T Cell Responses Rely on Amino Acid Transporter ASCT2  
697 Facilitation of Glutamine Uptake and mTORC1 Kinase Activation. *Immunity* 2014;40(5):692–705.
- 698 28. Carr EL et al. Glutamine Uptake and Metabolism Are Coordinately Regulated by ERK/MAPK  
699 during T Lymphocyte Activation. *J. Immunol.* 2010;185(2):1037–1044.
- 700 29. Liu Q, Tian X, Maruyama D, Arjomandi M, Prakash A. Lung immune tone via gut-lung axis:  
701 gut-derived LPS and short-chain fatty acids' immunometabolic regulation of lung IL-1 $\beta$ , FFAR2,  
702 and FFAR3 expression. *Am. J. Physiol.-Lung Cell. Mol. Physiol.* 2021;321(1):L65–L78.
- 703 30. Pathak KV et al. Molecular Profiling of Innate Immune Response Mechanisms in Ventilator-  
704 associated Pneumonia. *Mol. Cell. Proteomics* 2020;19(10):1688–1705.
- 705 31. Perea L et al. Reduced airway levels of fatty-acid binding protein 4 in COPD: relationship with  
706 airway infection and disease severity. *Respir. Res.* 2020;21(1):21.
- 707 32. Liao M et al. Single-cell landscape of bronchoalveolar immune cells in patients with COVID-  
708 19. *Nat. Med.* 2020;26(6):842–844.
- 709 33. Broch M et al. Macrophages are novel sites of expression and regulation of retinol binding  
710 protein-4 (RBP4). *Physiol. Res.* 2010;59(2):299–303.
- 711 34. Dickson RP et al. Analysis of culture-dependent versus culture-independent techniques for  
712 identification of bacteria in clinically obtained bronchoalveolar lavage fluid. *J. Clin. Microbiol.*  
713 2014;52(10):3605–3613.
- 714 35. Langelier C et al. Metagenomic Sequencing Detects Respiratory Pathogens in Hematopoietic  
715 Cellular Transplant Patients. *Am. J. Respir. Crit. Care Med.* 2018;197(4):524–528.
- 716 36. Kalantar KL et al. Metagenomic comparison of tracheal aspirate and mini-bronchial alveolar  
717 lavage for assessment of respiratory microbiota. *Am. J. Physiol. Lung Cell. Mol. Physiol.*  
718 2019;316(3):L578–L584.

- 719 37. Deng X et al. Metagenomic sequencing with spiked primer enrichment for viral diagnostics  
720 and genomic surveillance. *Nat. Microbiol.* 2020;5(3):443–454.
- 721 38. Quan J et al. FLASH: a next-generation CRISPR diagnostic for multiplexed detection of  
722 antimicrobial resistance sequences. *Nucleic Acids Res.* 2019;47(14):e83.
- 723 39. Wilson MR et al. Clinical Metagenomic Sequencing for Diagnosis of Meningitis and  
724 Encephalitis. *N. Engl. J. Med.* 2019;380(24):2327–2340.
- 725 40. Blauwkamp TA et al. Analytical and clinical validation of a microbial cell-free DNA sequencing  
726 test for infectious disease. *Nat. Microbiol.* 2019;4(4):663–674.
- 727 41. Zinter MS et al. Pulmonary Metagenomic Sequencing Suggests Missed Infections in  
728 Immunocompromised Children. *Clin. Infect. Dis.* 2019;68(11):1847–1855.
- 729 42. Charalampous T et al. Nanopore metagenomics enables rapid clinical diagnosis of bacterial  
730 lower respiratory infection. *Nat. Biotechnol.* 2019;37(7):783–792.
- 731 43. Zheng Y, Qiu X, Wang T, Zhang J. The Diagnostic Value of Metagenomic Next-Generation  
732 Sequencing in Lower Respiratory Tract Infection. *Front. Cell. Infect. Microbiol.* 2021;11:694756.
- 733 44. Liang M et al. Metagenomic next-generation sequencing for accurate diagnosis and  
734 management of lower respiratory tract infections. *Int. J. Infect. Dis.* 2022;122:921–929.
- 735 45. Li C-X et al. High resolution metagenomic characterization of complex infectomes in paediatric  
736 acute respiratory infection. *Sci. Rep.* 2020;10(1):3963.
- 737 46. Chen H et al. Clinical Utility of In-house Metagenomic Next-generation Sequencing for the  
738 Diagnosis of Lower Respiratory Tract Infections and Analysis of the Host Immune Response. *Clin.*  
739 *Infect. Dis.* 2020;71(Suppl 4):S416–S426.
- 740 47. Mick E et al. Upper airway gene expression reveals suppressed immune responses to SARS-  
741 CoV-2 compared with other respiratory viruses. *Nat. Commun.* 2020;11(1):5854.
- 742 48. Rajagopala SV et al. Metatranscriptomics to characterize respiratory virome, microbiome, and  
743 host response directly from clinical samples. *Cell Rep. Methods* 2021;1(6):100091.

- 744 49. Bray NL, Pimentel H, Melsted P, Pachter L. Near-optimal probabilistic RNA-seq quantification.  
745 *Nat. Biotechnol.* 2016;34(5):525–527.
- 746 50. Sonesson C, Love MI, Robinson MD. Differential analyses for RNA-seq: transcript-level  
747 estimates improve gene-level inferences. *F1000Research* 2015;4:1521.
- 748 51. Ritchie ME et al. limma powers differential expression analyses for RNA-sequencing and  
749 microarray studies. *Nucleic Acids Res.* 2015;43(7):e47.
- 750 52. Subramanian A et al. Gene set enrichment analysis: A knowledge-based approach for  
751 interpreting genome-wide expression profiles. *Proc. Natl. Acad. Sci.* 2005;102(43):15545–15550.
- 752 53. Korotkevich G et al. Fast gene set enrichment analysis. *bioRxiv* 2021;060012.
- 753 54. Croft D et al. The Reactome pathway knowledgebase. *Nucleic Acids Res.* 2014;42(Database  
754 issue):D472-477.
- 755 55. Love MI, Huber W, Anders S. Moderated estimation of fold change and dispersion for RNA-  
756 seq data with DESeq2. *Genome Biol.* 2014;15(12):550.
- 757 56. Friedman J, Hastie T, Tibshirani R. Regularization Paths for Generalized Linear Models via  
758 Coordinate Descent. *J. Stat. Softw.* 2010;33(1):1–22.
- 759 57. Liaw A, Wiener M. Classification and Regression by randomForest. 2002;2:5.
- 760 58. Robin X et al. pROC: an open-source package for R and S+ to analyze and compare ROC  
761 curves. *BMC Bioinformatics* 2011;12(1):77.
- 762 59. Kalantar KL et al. IDseq—An open source cloud-based pipeline and analysis service for  
763 metagenomic pathogen detection and monitoring. *GigaScience* 2020;9(10).
- 764 60. Venables WN, Ripley BD. *Modern Applied Statistics with S*. New York: Springer-Verlag; 2002.
- 765 61. vegan: Community Ecology Package version 2.3-5 from R-Forge. <https://rdrr.io/rforge/vegan/>.
- 766 62. Simon TD, Haaland W, Hawley K, Lambka K, Mangione-Smith R. Development and Validation  
767 of the Pediatric Medical Complexity Algorithm (PMCA) Version 3.0. *Acad. Pediatr.*  
768 2018;18(5):577–580.

769 **Table 1:** Demographic and clinical cohort characteristics.

|                                                                         | <b>Definite<br/>(n=117)</b> | <b>No Evidence<br/>(n=50)</b> | <b>P-value*</b> | <b>Suspected<br/>(n=57)</b> | <b>Indeterminate<br/>(n=37)</b> |
|-------------------------------------------------------------------------|-----------------------------|-------------------------------|-----------------|-----------------------------|---------------------------------|
| <b>Female, n (%)</b>                                                    | 45 (38.5%)                  | 25 (50.0%)                    | 0.18            | 26 (45.6%)                  | 16 (43.2%)                      |
| <b>Age, median [IQR]</b>                                                | 0.5 [0.2, 1.8]              | 6.5 [1.5, 12.9]               | <0.001          | 1.7 [0.5, 6.0]              | 1.5 [0.6, 10.8]                 |
| <b>Race, n (%)</b>                                                      |                             |                               |                 |                             |                                 |
| White                                                                   | 69 (59.0%)                  | 30 (60.0%)                    | 0.99            | 33 (57.9%)                  | 20 (54.1%)                      |
| Black/African American                                                  | 26 (22.2%)                  | 7 (14.0%)                     | 0.29            | 11 (19.3%)                  | 10 (27.0%)                      |
| Asian                                                                   | 5 (4.3%)                    | 6 (12.0%)                     | 0.088           | 2 (3.5%)                    | 2 (5.4%)                        |
| American Indian or Alaskan Native                                       | 1 (0.9%)                    | 1 (2.0%)                      | 0.99            | 1 (1.8%)                    | 0 (0.0%)                        |
| Native Hawaiian/Other Pacific Islander                                  | 1 (0.9%)                    | 0 (0.0%)                      | 0.99            | 0 (0.0%)                    | 0 (0.0%)                        |
| More than one race                                                      | 3 (2.6%)                    | 1 (2.0%)                      | 0.99            | 1 (1.8%)                    | 1 (0.03%)                       |
| Unknown                                                                 | 12 (10.3%)                  | 5 (10.0%)                     | 0.99            | 9 (15.8%)                   | 4 (10.8%)                       |
| <b>Hispanic or Latino, n (%)</b>                                        | 17 (14.5%)                  | 6 (12.0%)                     | 0.81            | 14 (24.6%)                  | 7 (18.9%)                       |
| <b>Comorbidities (CCC)†, n (%)</b>                                      | 38 (32.5%)                  | 26 (52.0%)                    | 0.024           | 34 (59.7%)                  | 14 (37.8%)                      |
| <b>Immunosuppressed, n (%)</b>                                          | 3 (2.6%)                    | 7 (14.0%)                     | 0.0085          | 5 (8.8%)                    | 6 (16.2%)                       |
| <b>Admission category, n (%)</b>                                        |                             |                               |                 |                             |                                 |
| Medical                                                                 | 117 (100.0%)                | 28 (56.0%)                    | p<0.001         | 57 (100.0%)                 | 29 (78.4%)                      |
| Surgical                                                                | 0 (0.0%)                    | 15 (30.0%)                    | p<0.001         | 0 (0.0%)                    | 3 (8.1%)                        |
| Trauma                                                                  | 0 (0.0%)                    | 7 (14.0%)                     | p<0.001         | 0 (0.0%)                    | 4 (10.8%)                       |
| <b>Time from hospital admission to intubation (hours), median [IQR]</b> | 4.8 [0.0, 23.6]             | 3.5 [0.0, 20.9]               | 0.60            | 2.6 [0.0, 15.9]             | 1.0 [0.0, 26.5]                 |
| <b>Abx on or before sample date‡, n(%)</b>                              | 112 (95.7%)                 | 42 (84.0%)                    | 0.022           | 51 (89.5%)                  | 30 (69.8%)                      |

770 \*Nominal p-values comparing Definite and No Evidence patients. Mann-Whitney test used for all  
771 continuous variables. Fisher's exact test used for all categorical variables.  
772 †Complex Chronic Conditions(62).  
773 ‡Antibiotic treatment started on or prior to the date of sample collection.

774 **Figure legends**

775

776

777

**Figure 1: Study overview.**

778 Pediatric patients with acute respiratory failure requiring mechanical ventilation were clinically  
779 adjudicated into four LRTI status groups. The Definite and No Evidence groups, whose LRTI  
780 status was presumed to be known, were used to develop an integrated host/microbe mNGS  
781 classifier for LRTI and to evaluate its performance by cross-validation. The classifier was then  
782 applied to the Suspected and Indeterminate groups, whose LRTI status was considered  
783 uncertain. The integrated mNGS classifier combines a host probability of LRTI derived from the  
784 host gene counts, and features of any viral or bacterial/fungal pathogens derived from the non-  
785 host (microbial) taxon counts.

786

787

**Figure 2: Host gene expression classifier for LRTI diagnosis.**

788 **A)** Receiver operating characteristic (ROC) curve of the host gene expression classifier in each  
789 of the test folds. The median and range of the area under the curve (AUC) are indicated. **B)** Bar  
790 plot showing the number and percentage of Definite and No Evidence patients that were classified  
791 according to their clinical adjudication using a 50% out-of-fold probability threshold. **C)** Heatmap  
792 showing standardized variance-stabilized expression values across all patients (columns) for the  
793 14 final classifier genes (rows) selected from the full Definite and No Evidence dataset. Shown  
794 are the LRTI adjudication (top colored horizontal bar) and out-of-fold LRTI probability (top dot plot)  
795 of each patient, and the regression coefficient of each selected gene (side bar plot).

796

797

**Figure 3: Metagenomic identification of respiratory pathogens.**

798 **A)** Bar plot showing the distribution of viruses detected by mNGS after background filtering in the  
799 Definite and No Evidence patients. RSV, respiratory syncytial virus; HRV, human rhinovirus; PIV,  
800 parainfluenza virus; HMPV, human metapneumovirus; HCoV, human coronavirus; IV, influenza  
801 virus; ADV, adenovirus; HBoV, human bocavirus; CMV, cytomegalovirus. **B)** Boxplot showing the  
802  $\log_{10}$ -transformed summed abundance, measured in reads-per-million (rpM), of all pathogenic  
803 viruses detected in each patient, separated by group. Prior to  $\log_{10}$ -transformation, the minimum  
804 non-zero rpM value in the dataset was divided by 10 and added to all the samples. Horizontal  
805 lines denote the median, box hinges represent the interquartile range (IQR), and whiskers extend  
806 to the most extreme value no greater than  $1.5 \times \text{IQR}$  from the hinges. **C)** Analysis steps applied as  
807 part of the rules-based model (RBM), a heuristic approach designed to identify potential  
808 bacterial/fungal pathogens in the context of LRTI. **D)** Graphical illustration of the RBM results in  
809 two representative Definite patients. Each dot is a bacterial/fungal species most abundant in its  
810 respective genus. A species above the maximum drop-off in rpM has a red fill, otherwise the fill  
811 is white. A species on the list of known respiratory pathogens has a black outline, otherwise the  
812 outline is gray. **E)** Bar plot showing the distribution of bacteria/fungi called as potential pathogens  
813 by the RBM in the Definite and No Evidence patients. *Strep. spp.*, *Streptococcus* species other  
814 than *S. pneumoniae*. **F)** Boxplot showing the proportion of the RBM-identified pathogen(s) out of  
815 all non-host counts in each patient, separated by group. Horizontal lines denote the median, box  
816 hinges represent the interquartile range (IQR), and whiskers extend to the most extreme value no  
817 greater than  $1.5 \times \text{IQR}$  from the hinges.



818 **Figure 4: Integrated host/microbe classifier for LRTI diagnosis.**  
819 **A)** Schematic of the integrated host/microbe classifier. **B)** Receiver operating characteristic (ROC)  
820 curve of the integrated classifier in each of the test folds. The median and range of the area under  
821 the curve (AUC) are indicated. **C)** Bar plot showing the number and percentage of Definite and  
822 No Evidence patients that were classified according to their clinical adjudication using a 50% out-  
823 of-fold probability threshold. **D)** The shift in out-of-fold LRTI probability from the host classifier to  
824 the integrated classifier for Definite (left panel) and No Evidence (right panel) patients. Dark  
825 connecting lines represent samples whose LRTI probability shifted across the 50% threshold.  
826

827 **Figure 5: Application of the integrated classifier to Suspected and Indeterminate patients.**  
828 **A)** Bar plot showing the number and percentage of Suspected and Indeterminate patients that  
829 were classified as LRTI+ by the integrated classifier using a 50% probability threshold.  
830 **B)** Viruses detected by mNGS and bacteria/fungi identified by the RBM across the patients  
831 classified as LRTI+ in the Suspected and Indeterminate groups. HRV, human rhinovirus; RSV,  
832 respiratory syncytial virus; PIV, parainfluenza virus; HBoV, human bocavirus; HMPV, human  
833 metapneumovirus; HPeV, human parechovirus; IV, influenza virus; HCoV, human coronavirus.  
834 **C)** Overview of inputs and output of the integrated classifier for all Suspected and Indeterminate  
835 patients. Top bars denote the integrated probability of LRTI and are colored by patient group;  
836 black dots represent the input host LRTI probability; bottom vertical bars show the input  $\log_{10}$ -  
837 transformed viral and bacterial scores. Dashed lines indicate the 50% LRTI probability threshold  
838 and the 15% rule-out threshold.

# Cohort of mechanically ventilated pediatric patients (n=261)

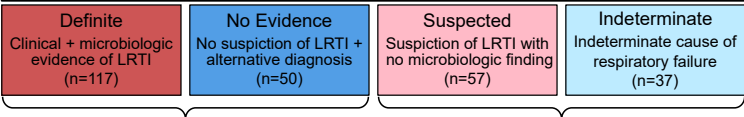

Develop metagenomic LRTI classifier and assess by cross-validation

Apply classifier to patients with uncertain LRTI diagnosis

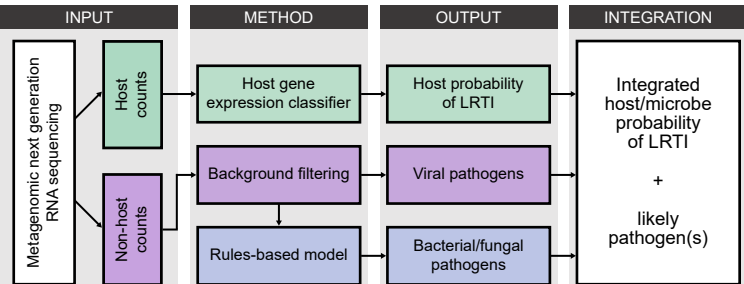

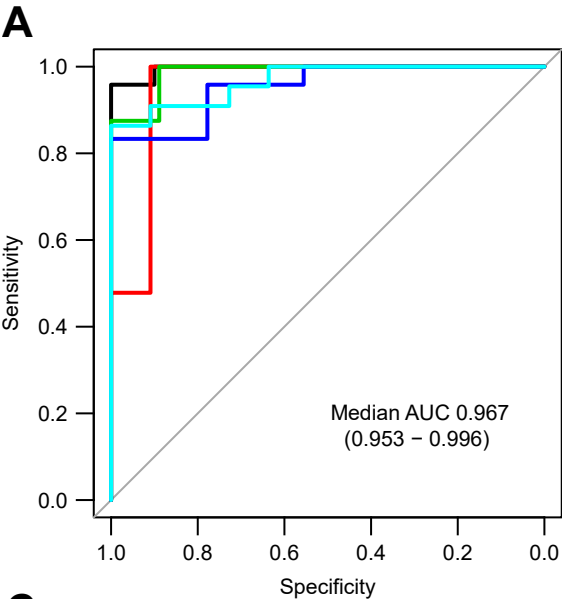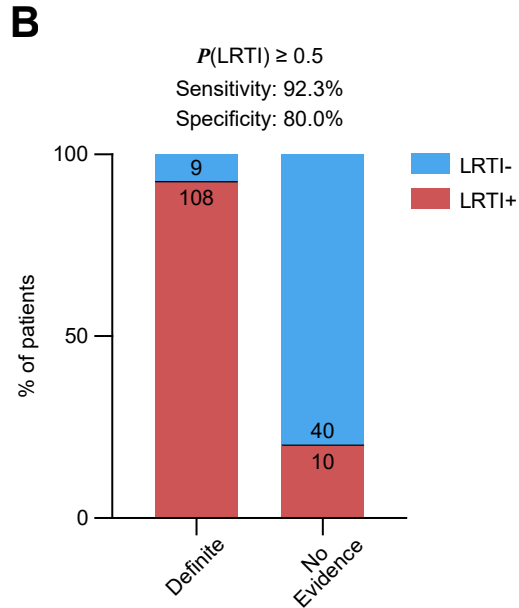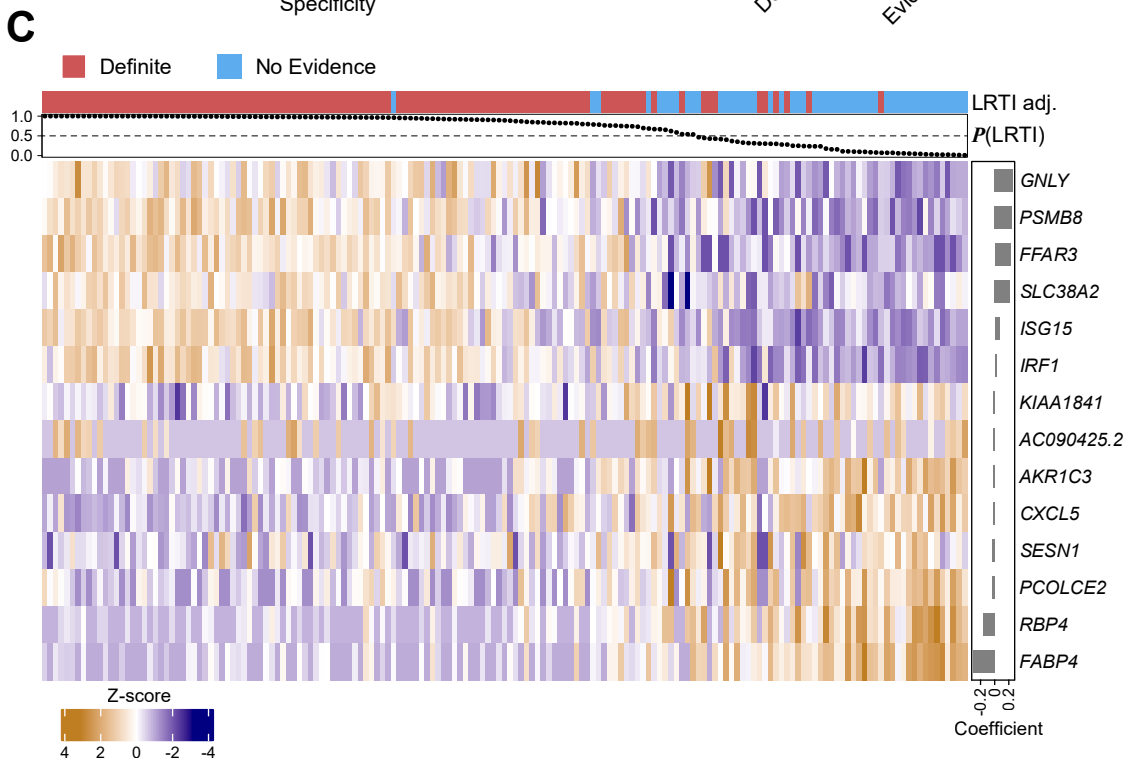

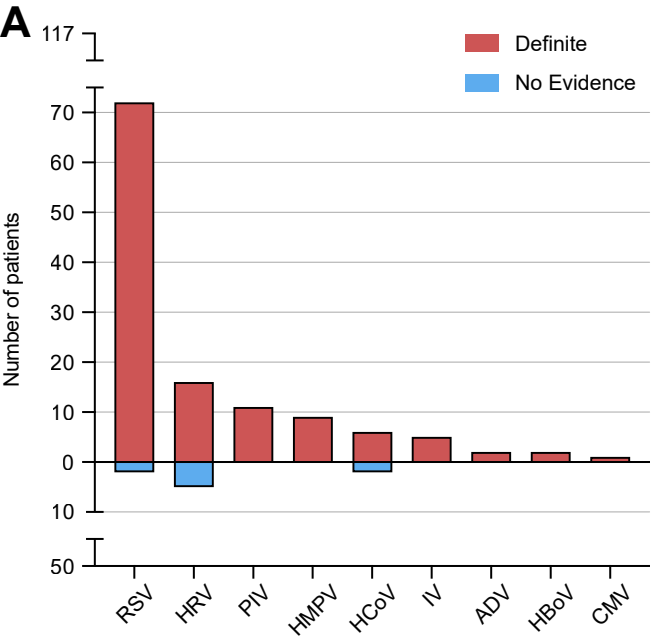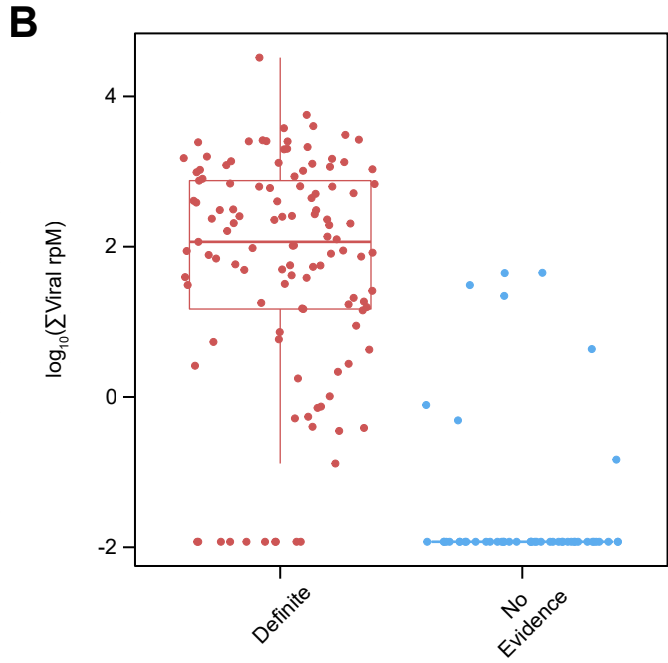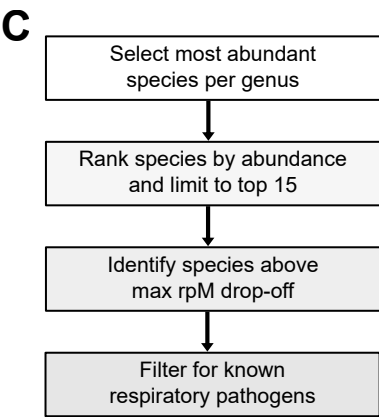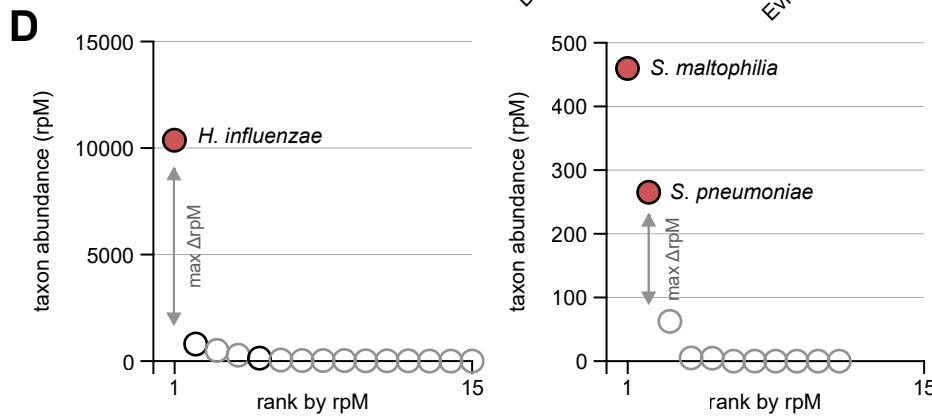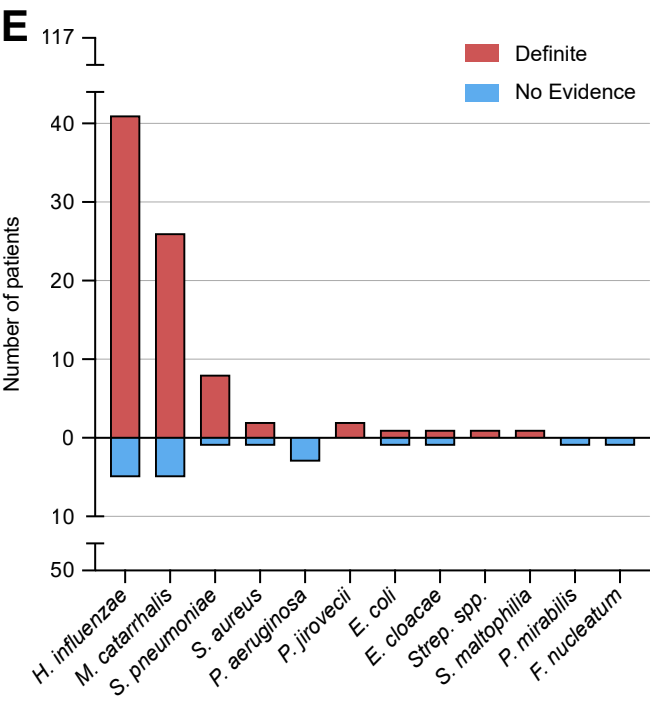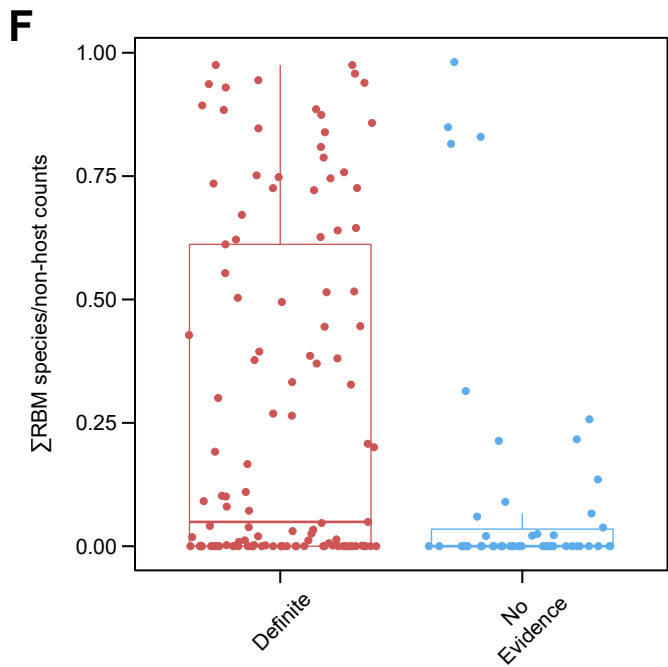

**A**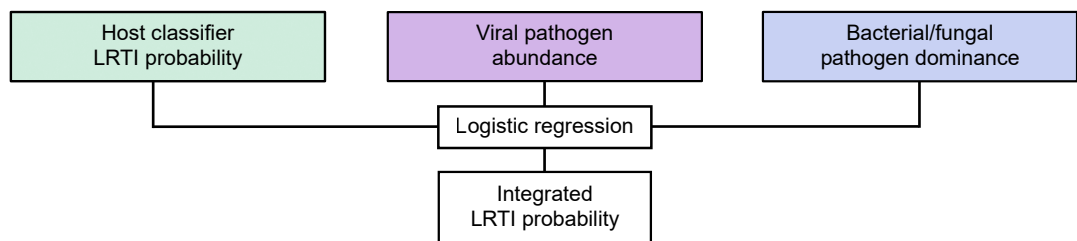**B**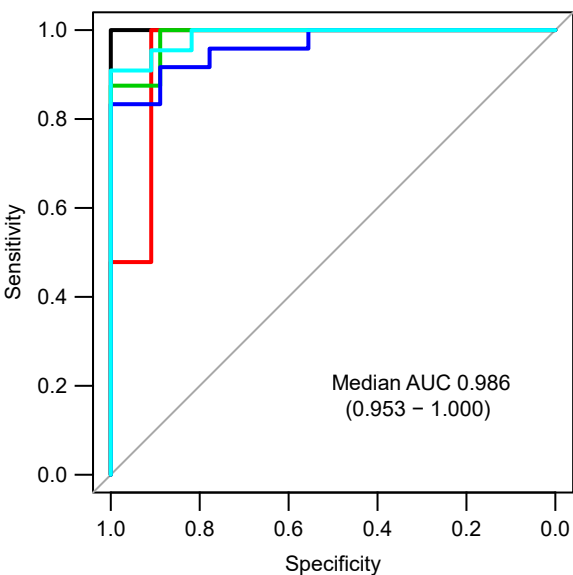**C**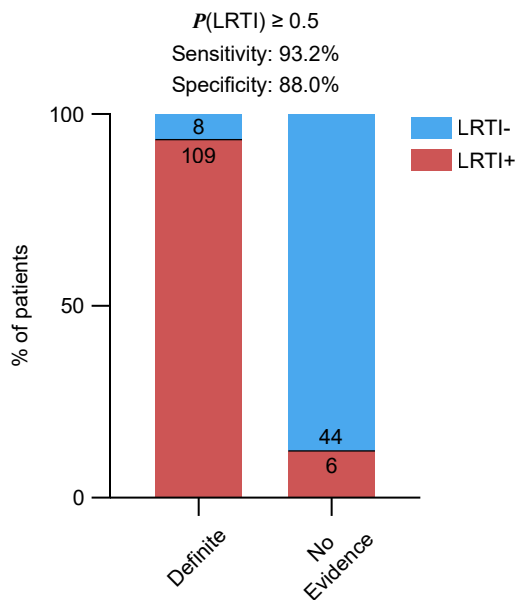**D**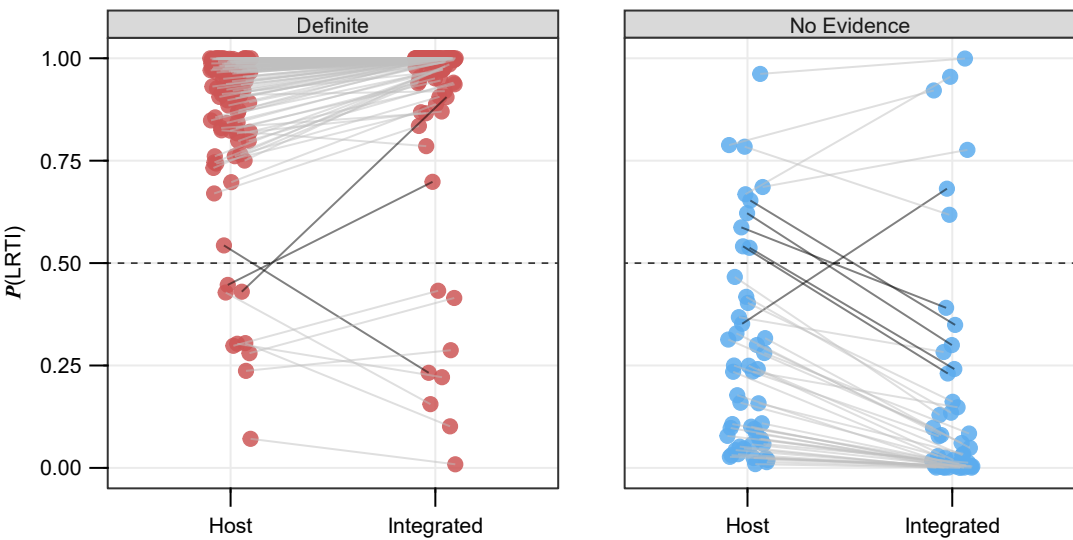

**A**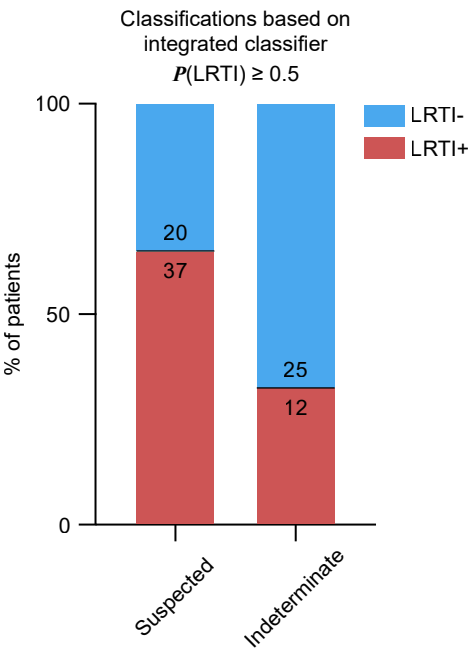**B**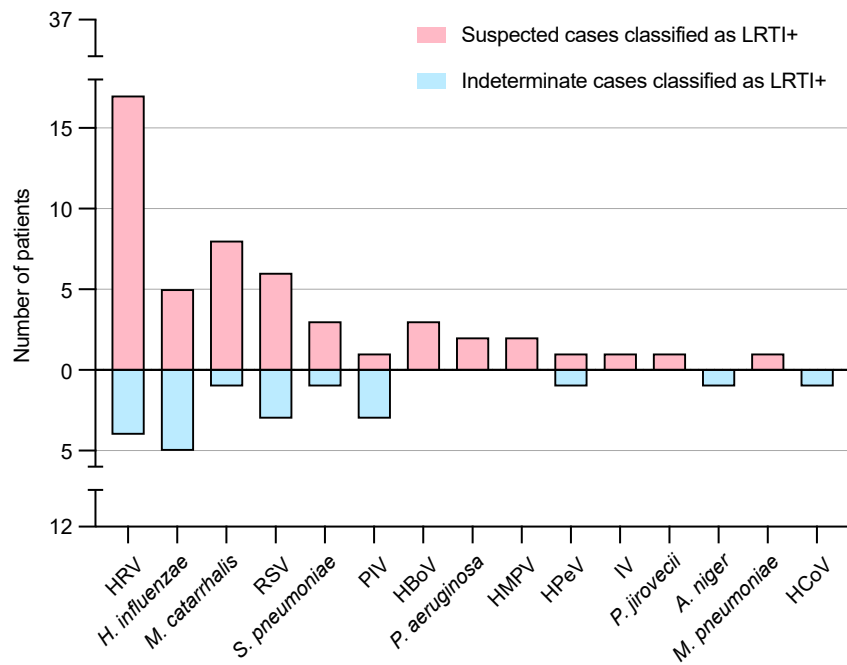**C**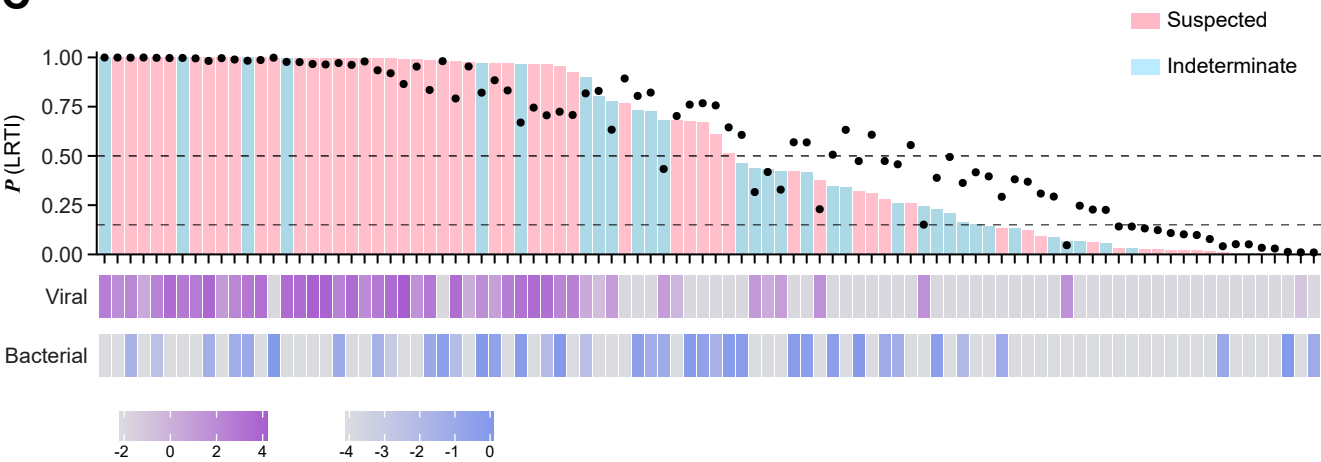

## Supplemental Figures

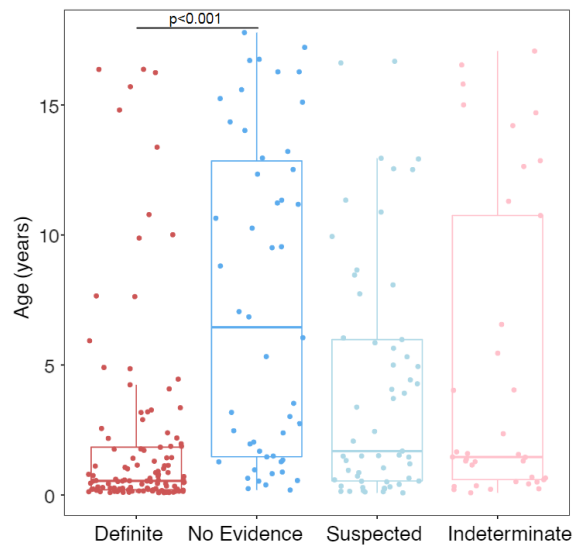

**Supplemental Figure 1:** Age distribution across the four LRTI status groups. P-value for the comparison between Definite and No Evidence patients was calculated using a Mann-Whitney test.

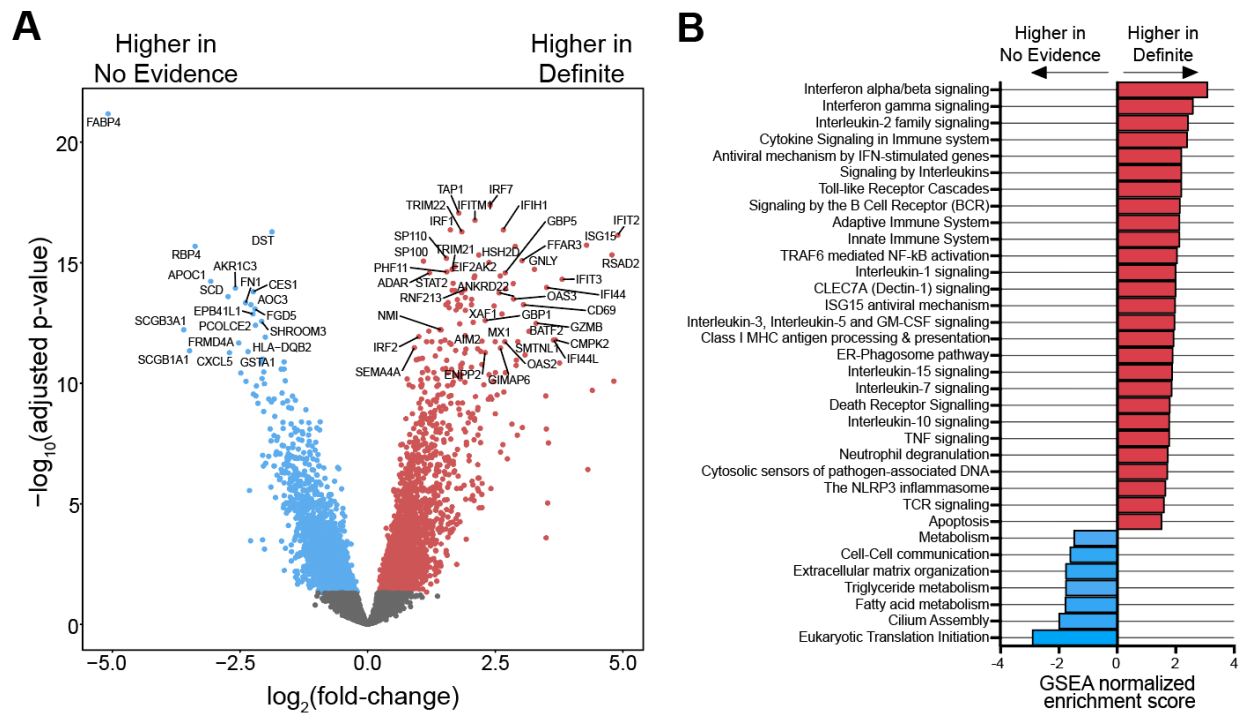

**Supplemental Figure 2: A)** Volcano plot highlighting genes differentially expressed (DE) between Definite and No Evidence patients. Colored genes reached statistical significance (adjusted p-value < 0.05). **B)** Normalized enrichment scores of selected REACTOME pathways that reached statistical significance (adjusted p-value < 0.05) in the GSEA using DE genes between Definite and No Evidence patients.



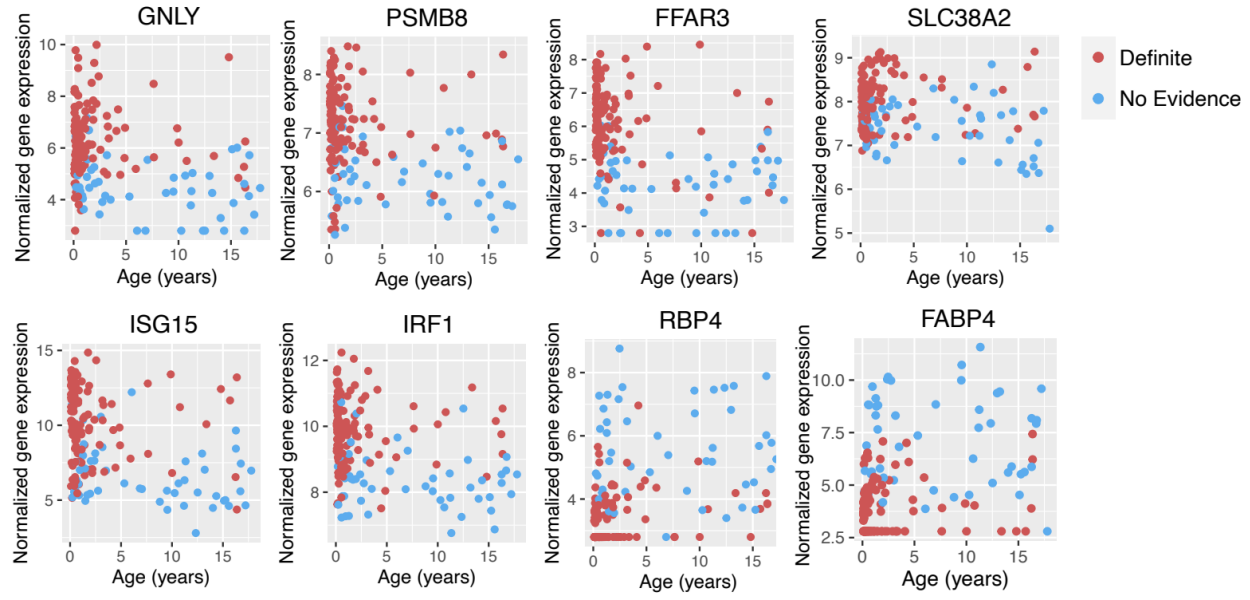

**Supplemental Figure 3:** Expression of eight host classifier genes as a function of age in Definite (red) and No Evidence (blue) patients.

**A** Per-patient agreement of upper airway viral PCR and lower airway mNGS in the Definite group

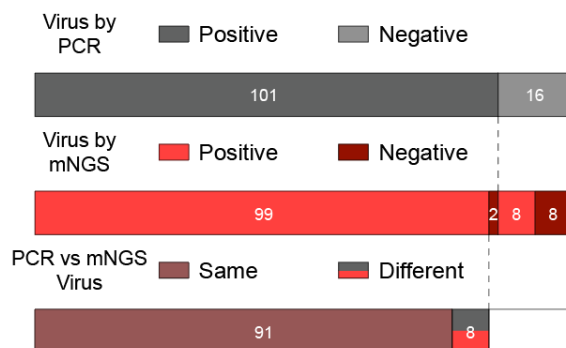

**B** Per-virus presence in mNGS compared to PCR

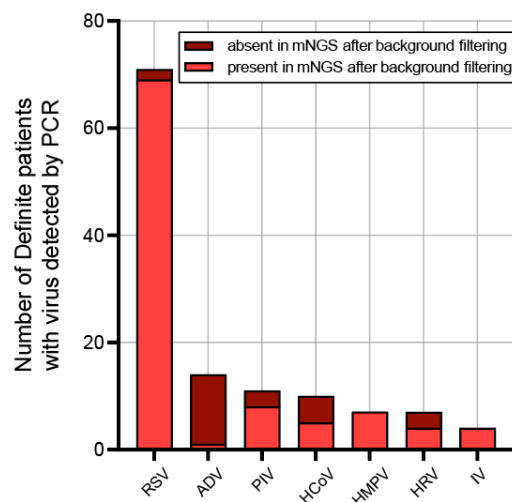

**C** Bacterial + viral alpha diversity

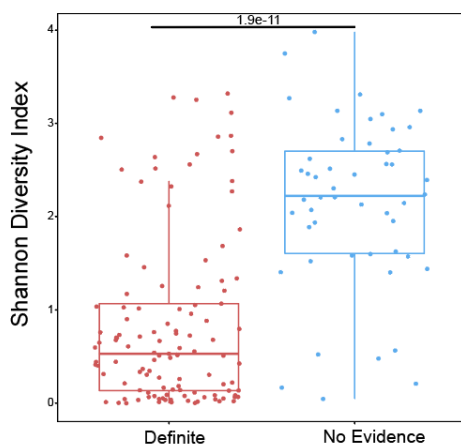

**D** Bacterial alpha diversity

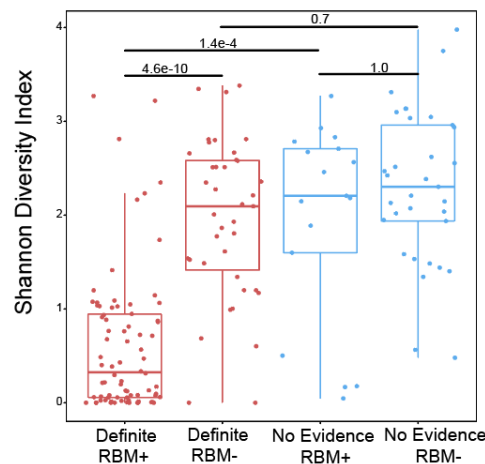

**E** Per-patient agreement of culture and RBM results in the Definite group

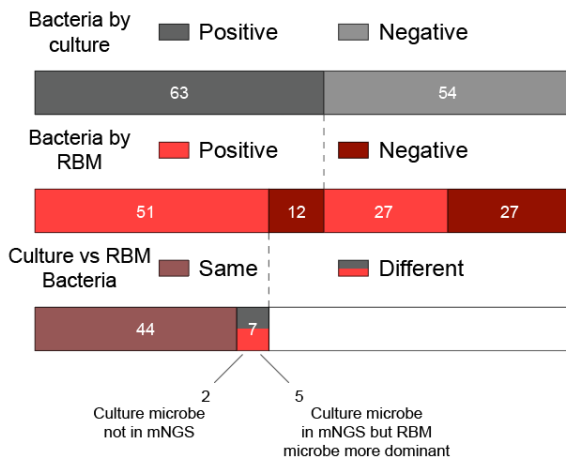

**F** Per-microbe presence in mNGS compared to culture

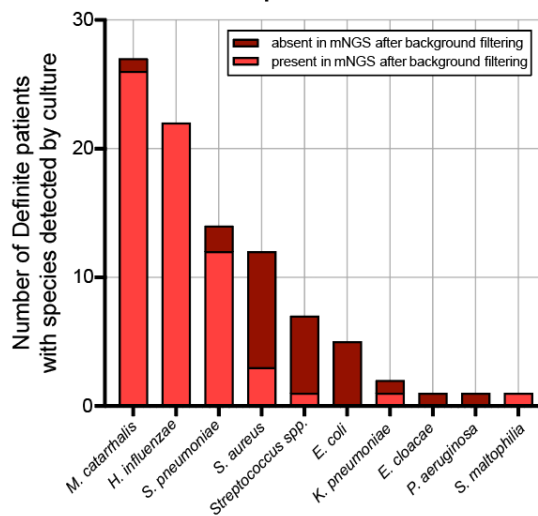

**Supplemental Figure 4: A)** Diagram depicting the agreement at the patient level between clinical upper respiratory PCR viral testing and lower airway mNGS detection after background filtering in the Definite group. Agreement between the two methods in a patient was defined as at least one virus identified by both. **B)** Bar plot showing the number of cases of each virus detected by clinical upper respiratory PCR testing and the proportion that was also present by mNGS after background filtering. RSV, respiratory syncytial virus; ADV, adenovirus; PIV, parainfluenza virus; HCoV, human coronavirus; HMPV, human metapneumovirus; HRV, human rhinovirus; IV, influenza virus. **C)** Boxplots of bacterial+viral microbiome alpha diversity, measured by the Shannon index, in Definite and No Evidence patients. Horizontal lines denote the median, box hinges represent the interquartile range (IQR), and whiskers extend to the most extreme value no greater than 1.5\*IQR from the hinges. **D)** Boxplots of bacterial-only alpha diversity measured by the Shannon index. Definite and No Evidence patients are split by whether a potential pathogen was identified by the RBM. P-values in C) and D) were calculated by a Mann-Whitney test with Bonferroni correction. **E)** Diagram depicting the agreement at the patient level between clinical culture and the results of the RBM in the Definite group. Agreement between the two methods in a patient was defined as at least one species identified by both. **F)** Bar plot showing the number of cases of each species detected by clinical culture and the proportion that was also present by mNGS after background filtering. *Streptococcus spp.*, *Streptococcus* species other than *S. pneumoniae*.

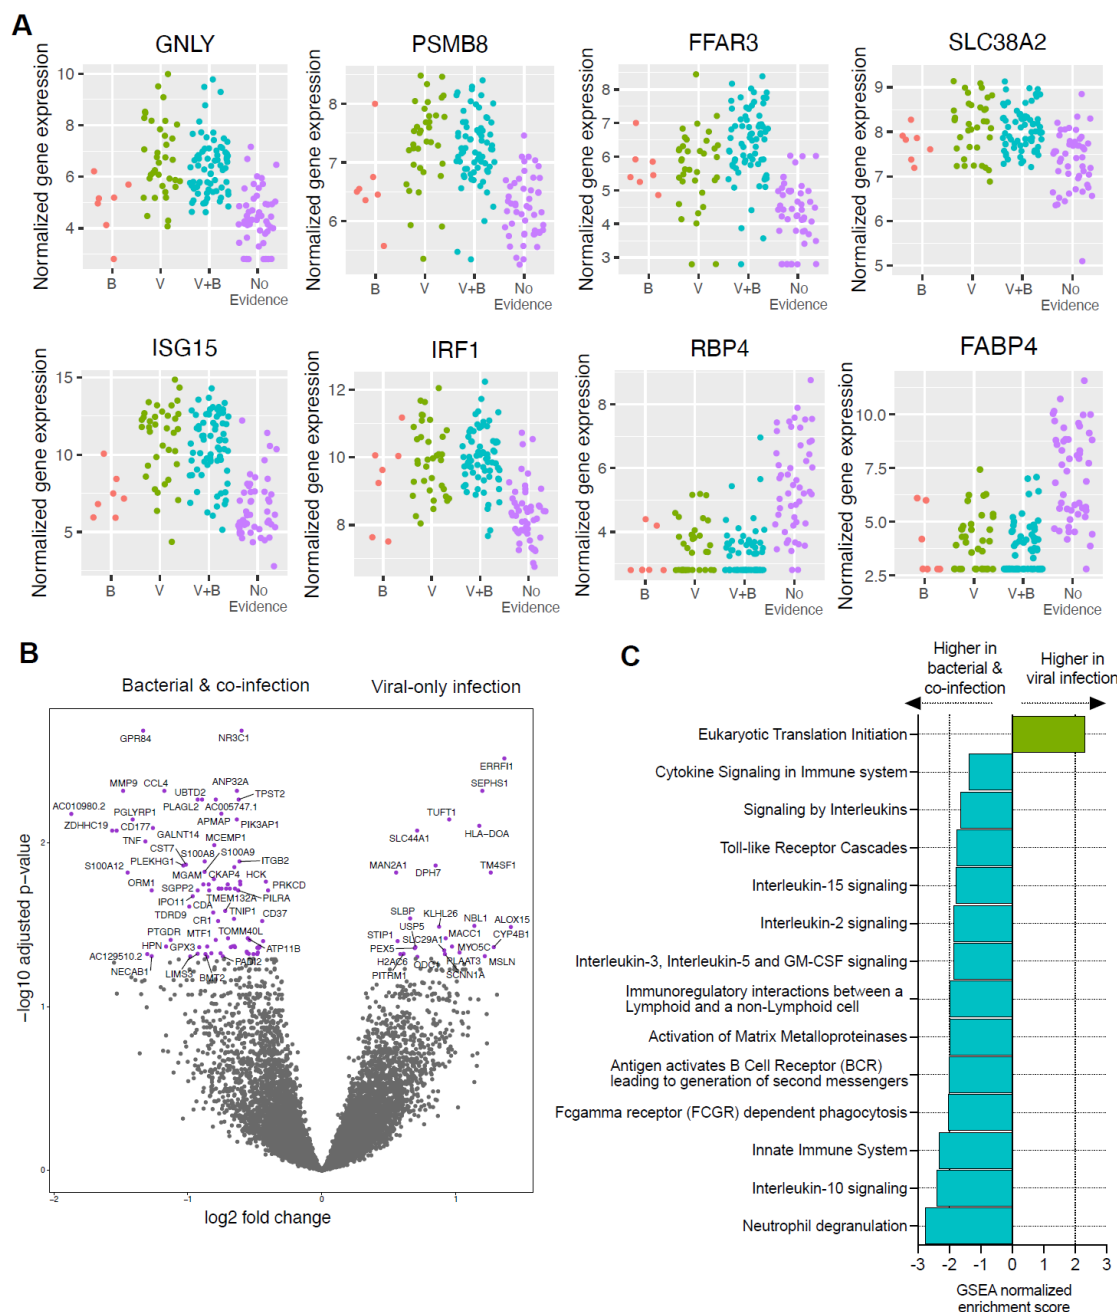

**Supplemental Figure 5: A)** Expression of eight host classifier genes in Definite patients with only bacterial pathogens identified by the RBM (B; n=7), only viral pathogens detected by mNGS (V; N=36), viral and bacterial pathogens (V+B; n=71), and the No Evidence patients (n=50) for comparison. Three patients from the Definite group are not shown because they did not have any pathogens identified by mNGS. One No Evidence sample in the plot of *SLC38A2* was omitted since it was an extreme outlier. **B)** Volcano plot highlighting genes differentially expressed (DE) between Definite patients with any bacterial infection (bacterial-only + co-infection) and viral-only infection. Genes colored in purple reached statistical significance (adjusted p-value < 0.05). **C)** Normalized enrichment scores of selected REACTOME pathways that reached statistical significance (adjusted p-value < 0.05) in the GSEA using the DE genes.

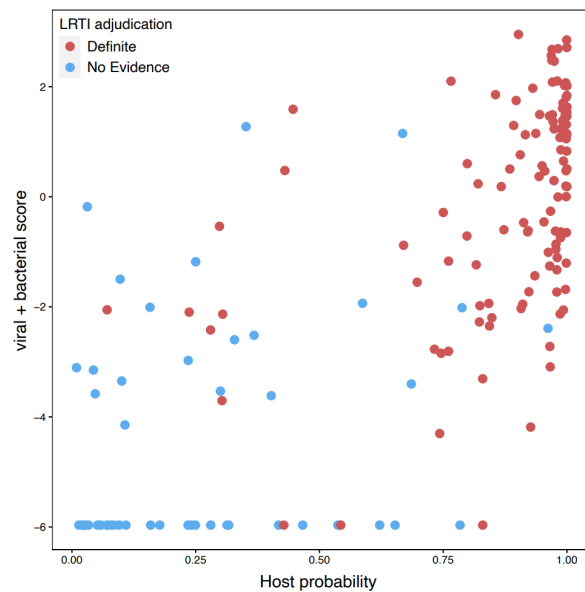

**Supplemental Figure 6:** Scatterplot of the host LRTI probability (x-axis) and the sum of the  $\log_{10}$ -transformed microbial scores (y-axis) in the Definite and No Evidence patients.

## Supplemental Tables

**Supplemental Table 1:** Host genes selected by lasso logistic regression in each of the 5 cross-validation train/test splits, and the area under the receiver operating characteristic curve (AUC) of a random forest classifier using the selected genes.

| Test fold | Gene ID         | Gene symbol       | Regression coefficient | AUC   |
|-----------|-----------------|-------------------|------------------------|-------|
| 1         | (Intercept)     | NA                | -2.0280997             | 0.996 |
| 1         | ENSG00000115523 | <i>GNLY</i>       | 0.40435424             |       |
| 1         | ENSG00000114737 | <i>CISH</i>       | 0.29736499             |       |
| 1         | ENSG00000185897 | <i>FFAR3</i>      | 0.2334893              |       |
| 1         | ENSG00000134294 | <i>SLC38A2</i>    | 0.23225034             |       |
| 1         | ENSG00000204264 | <i>PSMB8</i>      | 0.14737796             |       |
| 1         | ENSG00000133101 | <i>CCNA1</i>      | 0.13698008             |       |
| 1         | ENSG00000125347 | <i>IRF1</i>       | 0.08788657             |       |
| 1         | ENSG00000152766 | <i>ANKRD22</i>    | 0.01618487             |       |
| 1         | ENSG00000103356 | <i>EARS2</i>      | -0.005208              |       |
| 1         | ENSG00000272168 | <i>CASC15</i>     | -0.0129449             |       |
| 1         | ENSG00000163710 | <i>PCOLCE2</i>    | -0.0141204             |       |
| 1         | ENSG00000196139 | <i>AKR1C3</i>     | -0.0145091             |       |
| 1         | ENSG00000163735 | <i>CXCL5</i>      | -0.0202633             |       |
| 1         | ENSG00000164631 | <i>ZNF12</i>      | -0.0296153             |       |
| 1         | ENSG00000162929 | <i>KIAA1841</i>   | -0.031873              |       |
| 1         | ENSG00000102962 | <i>CCL22</i>      | -0.0470626             |       |
| 1         | ENSG00000196305 | <i>IARS1</i>      | -0.0541444             |       |
| 1         | ENSG00000259094 | <i>AC013457.1</i> | -0.0642868             |       |
| 1         | ENSG00000203865 | <i>ATP1A1-AS1</i> | -0.0785439             |       |
| 1         | ENSG00000115414 | <i>FN1</i>        | -0.0963792             |       |
| 1         | ENSG00000132300 | <i>PTCD3</i>      | -0.1094826             |       |
| 1         | ENSG00000273173 | <i>SNURF</i>      | -0.1236364             |       |
| 1         | ENSG00000138207 | <i>RBP4</i>       | -0.1867265             |       |
| 1         | ENSG00000170323 | <i>FABP4</i>      | -0.2260672             |       |
| 1         | ENSG00000182141 | <i>ZNF708</i>     | -0.2407744             |       |
| 2         | (Intercept)     | NA                | -0.4183313             | 0.953 |
| 2         | ENSG00000134294 | <i>SLC38A2</i>    | 0.21115084             |       |
| 2         | ENSG00000185897 | <i>FFAR3</i>      | 0.17219249             |       |
| 2         | ENSG00000115523 | <i>GNLY</i>       | 0.15221918             |       |
| 2         | ENSG00000204264 | <i>PSMB8</i>      | 0.0974774              |       |
| 2         | ENSG00000152766 | <i>ANKRD22</i>    | 0.06800369             |       |
| 2         | ENSG00000272821 | <i>U62317.2</i>   | 0.05245633             |       |
| 2         | ENSG00000187608 | <i>ISG15</i>      | 0.03953433             |       |
| 2         | ENSG00000162929 | <i>KIAA1841</i>   | -0.0224986             |       |
| 2         | ENSG00000196139 | <i>AKR1C3</i>     | -0.0991982             |       |
| 2         | ENSG00000170323 | <i>FABP4</i>      | -0.1720699             |       |

|   |                 |                   |            |       |
|---|-----------------|-------------------|------------|-------|
| 2 | ENSG00000253729 | <i>PRKDC</i>      | -0.2010562 |       |
| 2 | ENSG00000138207 | <i>RBP4</i>       | -0.2940594 |       |
| 3 | (Intercept)     | NA                | 0.27758103 | 0.986 |
| 3 | ENSG00000185507 | <i>IRF7</i>       | 0.29760005 |       |
| 3 | ENSG00000133101 | <i>CCNA1</i>      | 0.22848885 |       |
| 3 | ENSG00000115523 | <i>GPLY</i>       | 0.20275662 |       |
| 3 | ENSG00000185897 | <i>FFAR3</i>      | 0.09319602 |       |
| 3 | ENSG00000134294 | <i>SLC38A2</i>    | 0.05523801 |       |
| 3 | ENSG00000272821 | <i>U62317.2</i>   | 0.03959668 |       |
| 3 | ENSG00000196189 | <i>SEMA4A</i>     | 0.03111383 |       |
| 3 | ENSG00000136231 | <i>IGF2BP3</i>    | 0.01793655 |       |
| 3 | ENSG00000114737 | <i>CISH</i>       | 0.01066616 |       |
| 3 | ENSG00000117143 | <i>UAP1</i>       | -0.0043278 |       |
| 3 | ENSG00000163735 | <i>CXCL5</i>      | -0.0087013 |       |
| 3 | ENSG00000113068 | <i>PFDN1</i>      | -0.0087115 |       |
| 3 | ENSG00000149021 | <i>SCGB1A1</i>    | -0.0088169 |       |
| 3 | ENSG00000232629 | <i>HLA-DQB2</i>   | -0.0158939 |       |
| 3 | ENSG00000164631 | <i>ZNF12</i>      | -0.0351792 |       |
| 3 | ENSG00000273173 | <i>SNURF</i>      | -0.0502438 |       |
| 3 | ENSG00000196139 | <i>AKR1C3</i>     | -0.0532949 |       |
| 3 | ENSG00000170324 | <i>FRMPD2</i>     | -0.0607793 |       |
| 3 | ENSG00000259094 | <i>AC013457.1</i> | -0.0637096 |       |
| 3 | ENSG00000272660 | <i>AC090425.2</i> | -0.1024448 |       |
| 3 | ENSG00000008226 | <i>DLEC1</i>      | -0.1276673 |       |
| 3 | ENSG00000272168 | <i>CASC15</i>     | -0.1499889 |       |
| 3 | ENSG00000170323 | <i>FABP4</i>      | -0.4076148 |       |
| 4 | (Intercept)     | NA                | -5.181784  | 0.954 |
| 4 | ENSG00000175073 | <i>VCPIP1</i>     | 0.50212823 |       |
| 4 | ENSG00000115523 | <i>GPLY</i>       | 0.23413097 |       |
| 4 | ENSG00000135604 | <i>STX11</i>      | 0.23226792 |       |
| 4 | ENSG00000168394 | <i>TAP1</i>       | 0.13854581 |       |
| 4 | ENSG00000185897 | <i>FFAR3</i>      | 0.13639215 |       |
| 4 | ENSG00000185885 | <i>IFITM1</i>     | 0.07866599 |       |
| 4 | ENSG00000133106 | <i>EPST11</i>     | 0.05899777 |       |
| 4 | ENSG00000158769 | <i>F11R</i>       | -0.0055638 |       |
| 4 | ENSG00000163710 | <i>PCOLCE2</i>    | -0.0206461 |       |
| 4 | ENSG00000149021 | <i>SCGB1A1</i>    | -0.0263191 |       |
| 4 | ENSG00000182141 | <i>ZNF708</i>     | -0.1006603 |       |
| 4 | ENSG00000138207 | <i>RBP4</i>       | -0.1413799 |       |
| 4 | ENSG00000170323 | <i>FABP4</i>      | -0.2005039 |       |
| 5 | (Intercept)     | NA                | 0.5726104  | 0.967 |
| 5 | ENSG00000204264 | <i>PSMB8</i>      | 0.27278452 |       |
| 5 | ENSG00000115523 | <i>GPLY</i>       | 0.0762971  |       |

|   |                 |                |            |  |
|---|-----------------|----------------|------------|--|
| 5 | ENSG00000175073 | <i>VCPIP1</i>  | 0.05579582 |  |
| 5 | ENSG00000185897 | <i>FFAR3</i>   | 0.04184826 |  |
| 5 | ENSG00000188820 | <i>CALHM6</i>  | 0.03110363 |  |
| 5 | ENSG00000133106 | <i>EPST11</i>  | 0.02410902 |  |
| 5 | ENSG00000187608 | <i>ISG15</i>   | 0.00687972 |  |
| 5 | ENSG00000163710 | <i>PCOLCE2</i> | -0.0191247 |  |
| 5 | ENSG00000151914 | <i>DST</i>     | -0.029031  |  |
| 5 | ENSG00000163735 | <i>CXCL5</i>   | -0.1149234 |  |
| 5 | ENSG00000170323 | <i>FABP4</i>   | -0.389078  |  |

**Supplemental Table 2:** Genes selected for the final host classifier by lasso logistic regression applied to all the Definite and No Evidence patients, with their regression coefficients. The number of times the gene was selected across the 5 cross-validation (CV) splits is also indicated.

| Gene ID         | Gene symbol                                      | Gene product                                                | Regression coefficient | Times selected in CV |
|-----------------|--------------------------------------------------|-------------------------------------------------------------|------------------------|----------------------|
| ENSG00000115523 | <i>GNLY</i>                                      | Granulysin                                                  | 0.257                  | 5                    |
| ENSG00000204264 | <i>PSMB8</i>                                     | Proteasome subunit beta 8                                   | 0.249                  | 3                    |
| ENSG00000185897 | <i>FFAR3</i>                                     | Free fatty acid receptor 3                                  | 0.224                  | 5                    |
| ENSG00000134294 | <i>SLC38A2</i>                                   | Solute carrier family 38 member 2                           | 0.214                  | 3                    |
| ENSG00000187608 | <i>ISG15</i>                                     | ISG15 ubiquitin-like modifier                               | 0.070                  | 2                    |
| ENSG00000125347 | <i>IRF1</i>                                      | Interferon regulatory factor 1                              | 0.027                  | 1                    |
| ENSG00000162929 | <i>KIAA1841</i><br>(also known as <i>SANBR</i> ) | SANT and BTB domain regulator of class switch recombination | -0.014                 | 2                    |
| ENSG00000272660 | <i>AC090425.2</i>                                | Long non-coding RNA, antisense to <i>ACTL6A</i>             | -0.016                 | 1                    |
| ENSG00000196139 | <i>AKR1C3</i>                                    | Aldo-keto reductase family 1 member C3                      | -0.019                 | 3                    |
| ENSG00000163735 | <i>CXCL5</i>                                     | C-X-C motif chemokine ligand 5                              | -0.019                 | 3                    |
| ENSG00000080546 | <i>SESN1</i>                                     | Sestrin 1                                                   | -0.033                 | 0                    |
| ENSG00000163710 | <i>PCOLCE2</i>                                   | Procollagen C-endopeptidase enhancer 2                      | -0.033                 | 3                    |
| ENSG00000138207 | <i>RBP4</i>                                      | Retinol binding protein 4                                   | -0.167                 | 3                    |
| ENSG00000170323 | <i>FABP4</i>                                     | Fatty acid binding protein 4                                | -0.297                 | 5                    |
| (Intercept)     |                                                  |                                                             | -3.112                 |                      |



**Supplemental Table 3:** Differential expression results for the 14 final classifier genes comparing: **A)** No Evidence patients under four years old (n=23; median age 1.3 years) versus over four years old (n=27; median age 12.5), and **B)** Definite patients under four years old (n=100; median age 0.4) versus No Evidence patients under four years old (n=23; median age 1.3).

**A**

| Gene symbol       | Log <sub>2</sub> fold-change | P-value | Adjusted P-value |
|-------------------|------------------------------|---------|------------------|
| <i>GNLY</i>       | -1.14                        | 0.01    | 0.72             |
| <i>PSMB8</i>      | -0.33                        | 0.21    | 0.82             |
| <i>FFAR3</i>      | -0.43                        | 0.33    | 0.87             |
| <i>SLC38A2</i>    | -0.57                        | 0.07    | 0.75             |
| <i>ISG15</i>      | -1.68                        | 0.01    | 0.72             |
| <i>IRF1</i>       | -0.30                        | 0.25    | 0.83             |
| <i>KIAA1841</i>   | 0.14                         | 0.59    | 0.94             |
| <i>AC090425.2</i> | 1.48                         | 0.07    | 0.76             |
| <i>AKR1C3</i>     | 0.81                         | 0.10    | 0.76             |
| <i>CXCL5</i>      | 0.24                         | 0.67    | 0.95             |
| <i>SESN1</i>      | 0.27                         | 0.47    | 0.91             |
| <i>PCOLCE2</i>    | 0.54                         | 0.21    | 0.81             |
| <i>RBP4</i>       | -0.04                        | 0.95    | 0.99             |
| <i>FABP4</i>      | -0.56                        | 0.45    | 0.90             |

**B**

| Gene symbol       | Log <sub>2</sub> fold-change | P-value  | Adjusted P-value |
|-------------------|------------------------------|----------|------------------|
| <i>GNLY</i>       | 2.73                         | 2.11E-08 | 1.46E-06         |
| <i>PSMB8</i>      | 1.11                         | 7.78E-08 | 4.22E-06         |
| <i>FFAR3</i>      | 2.93                         | 9.70E-12 | 4.25E-09         |
| <i>SLC38A2</i>    | 0.60                         | 2.50E-05 | 4.33E-04         |
| <i>ISG15</i>      | 3.49                         | 3.71E-09 | 3.89E-07         |
| <i>IRF1</i>       | 1.52                         | 5.18E-12 | 2.88E-09         |
| <i>KIAA1841</i>   | -0.89                        | 2.84E-05 | 4.76E-04         |
| <i>AC090425.2</i> | -0.18                        | 7.50E-01 | 8.56E-01         |
| <i>AKR1C3</i>     | -2.48                        | 2.24E-12 | 1.42E-09         |
| <i>CXCL5</i>      | -2.63                        | 4.62E-09 | 4.52E-07         |
| <i>SESN1</i>      | -0.53                        | 4.92E-02 | 1.38E-01         |
| <i>PCOLCE2</i>    | -2.06                        | 2.60E-09 | 2.93E-07         |
| <i>RBP4</i>       | -3.64                        | 1.51E-17 | 1.00E-13         |
| <i>FABP4</i>      | -5.54                        | 4.02E-26 | 5.36E-22         |

**Supplemental Table 4:** Comparison of mNGS viral detection in TA samples with PCR viral detection in nasopharyngeal (NP) swabs or in the same TA samples in a subset of patients.

| Definite patients with matched NP swab and TA viral PCR testing (n=21) | Agreement of mNGS with NP swab PCR | Concordance of mNGS and NP swab PCR | Agreement of mNGS with TA PCR | Concordance of mNGS and TA PCR |
|------------------------------------------------------------------------|------------------------------------|-------------------------------------|-------------------------------|--------------------------------|
| All viruses                                                            | 22/34 = 64.7%                      | 22/37 = 59.5%                       | 23/24 = 95.8%                 | 23/26 = 88.5%                  |
| Respiratory syncytial virus                                            | 11/12 = 91.7%                      | 11/12 = 91.7%                       | 10/10 = 100%                  | 10/11 = 90.9%                  |
| Rhinovirus                                                             | 4/7 = 57.1%                        | 4/10 = 40%                          | 6/6 = 100%                    | 6/7 = 85.7%                    |
| Adenovirus                                                             | 0/6 = 0%                           | 0/6 = 0%                            | 0/0 = 100%                    | 0/0 = 100%                     |
| Coronavirus                                                            | 2/3 = 66.7%                        | 2/3 = 66.7%                         | 2/2 = 100%                    | 2/2 = 100%                     |
| Human metapneumovirus                                                  | 3/3 = 100%                         | 3/3 = 100%                          | 3/3 = 100%                    | 3/3 = 100%                     |
| Parainfluenza virus                                                    | 2/3 = 66.7%                        | 2/3 = 66.7%                         | 2/3 = 66.7%                   | 2/3 = 66.7%                    |

Agreement reflects the number of viruses detected by mNGS out of the total number of viruses detected by PCR.

Concordance reflects the number of viruses detected by both mNGS and PCR out of the total number of viruses detected by at least one method.

**Supplemental Table 5:** Per-fold area under the curve (AUC) values for the integrated host/microbe logistic regression classifier.

| Test fold | AUC   |
|-----------|-------|
| 1         | 1.000 |
| 2         | 0.953 |
| 3         | 0.986 |
| 4         | 0.963 |
| 5         | 0.988 |

**Supplemental Table 6: A) mNGS and clinical microbiology results for the Definite and No Evidence patients whose integrated LRTI classification was inconsistent with their adjudication. B) Primary diagnoses of the No Evidence patients whose integrated LRTI classification was inconsistent with their adjudication.**

**A**

| Patient | LRTI adjudication | Host P(LRTI) | Clinical microbiology results                                       | mNGS viruses     | Viral $\Sigma$ rpM | mNGS RBM hits                                | Dominance of RBM hits | Integ. P(LRTI) |
|---------|-------------------|--------------|---------------------------------------------------------------------|------------------|--------------------|----------------------------------------------|-----------------------|----------------|
| P2      | Definite          | 0.30         | <i>S. aureus</i> , HRV                                              |                  | 0                  | <i>S. aureus</i>                             | 0.62                  | 0.10           |
| P3      | Definite          | 0.30         | HRV, ADV                                                            | HRV C            | 2.15               |                                              | 0                     | 0.22           |
| P6      | Definite          | 0.24         | PIV, HCoV                                                           | PIV 4, HCoV NL63 | 87.61              |                                              | 0                     | 0.29           |
| P124    | Definite          | 0.28         | HCoV, <i>S. aureus</i> , <i>S. viridans</i>                         | HCoV 229E        | 41.58              |                                              | 0                     | 0.41           |
| P185    | Definite          | 0.07         | <i>S. maltophilia</i> , <i>S. pneumoniae</i> , <i>K. pneumoniae</i> |                  | 0                  | <i>S. maltophilia</i> , <i>S. pneumoniae</i> | 0.75                  | 0.01           |
| P189    | Definite          | 0.30         | <i>S. aureus</i>                                                    | CMV              | 0.38               | <i>S. aureus</i>                             | 0.75                  | 0.43           |
| P195    | Definite          | 0.54         | <i>S. viridans</i> , <i>E. coli</i>                                 |                  | 0                  |                                              | 0                     | 0.23           |
| P218    | Definite          | 0.43         | <i>M. catarrhalis</i>                                               |                  | 0                  |                                              | 0                     | 0.16           |
| P1      | No Evidence       | 0.67         | No testing performed                                                | HCoV NL63        | 44.94              | <i>P. aeruginosa</i>                         | 0.31                  | 0.95           |
| P30     | No Evidence       | 0.35         | No culture performed, negative PCR                                  | HRV C            | 22.15              | <i>M. catarrhalis</i>                        | 0.85                  | 0.68           |
| P75     | No Evidence       | 0.96         | No culture performed, negative PCR                                  | RSV              | 44.53              |                                              | 0                     | 1.00           |
| P166    | No Evidence       | 0.79         | No testing performed                                                |                  | 0                  | <i>S. aureus</i>                             | 0.82                  | 0.92           |
| P175    | No Evidence       | 0.69         | No testing performed                                                | HCoV NL63        | 4.33               |                                              | 0                     | 0.78           |
| P250    | No Evidence       | 0.78         | Negative culture, no PCR performed                                  |                  | 0                  |                                              | 0                     | 0.62           |

rpM, reads-per-million; RBM, rules-based model.

ADV, adenovirus

HCoV, human coronavirus

CMV, cytomegalovirus

HRV, human rhinovirus

PIV, parainfluenza virus

RSV, respiratory syncytial virus

**B**

| Patient | LRTI adjudication | Primary diagnosis                   |
|---------|-------------------|-------------------------------------|
| P1      | No Evidence       | Neurological                        |
| P30     | No Evidence       | Trauma                              |
| P75     | No Evidence       | Non-infectious respiratory distress |
| P166    | No Evidence       | Ingestion (drug/toxin)              |
| P175    | No Evidence       | Ingestion (drug/toxin)              |
| P250    | No Evidence       | Seizures                            |

## **Supplemental Data Files**

**Supplemental Data File 1.** Basic sample metadata.

**Supplemental Data File 2.** Differential expression (DE) analyses between: i) Definite and No Evidence patients; ii) Definite patients with any bacterial LRTI and with purely viral LRTI.

**Supplemental Data File 3.** Gene set enrichment analysis (GSEA) results from the DE between: i) Definite and No Evidence patients; ii) Definite patients with any bacterial LRTI and with purely viral LRTI.

**Supplemental Data File 4.** Pathogens identified in Definite patients by clinical testing and by mNGS.
